# Supplementary material for: The deubiquitylase USP7 is a novel cyclin F-interacting protein and regulates cyclin F protein stability
Source: Aging (Albany NY). 2022 Nov 5;14(21):8645–60. doi: 10.18632/aging.204372 (PMC9699750; doi:10.18632/aging.204372)
Supplement: Supplementary File 1 [file aging-14-204372-s003.xlsx]

## Sheet: Samples View Report for 092914_
#092914_Sharma etal, Mass Spectrometry_Cyclin F-interacting proteins_Samples Report created on 06/29/2022
Minimum peptide probability threshold = 95 %
Minimum protein probability threshold = 95%				Total Unique Peptide Count
	Identified Proteins (1225/1252)	Accession Number	Molecular Weight	U2OS_Cyclin F_8hr	U2OS_Cyclin F_16hr	U2OS_Mock_8hr	U2OS_Mock_16hr
#	1-phosphatidylinositol 4,5-bisphosphate phosphodiesterase delta-3 OS=Homo sapiens GN=PLCD3 PE=1 SV=3	PLCD3_HUMAN	89 kDa	2	0	0	0
1	2'-5'-oligoadenylate synthase-like protein OS=Homo sapiens GN=OASL PE=1 SV=2	OASL_HUMAN	59 kDa	2	0	0	0
2	26S protease regulatory subunit 4 OS=Homo sapiens GN=PSMC1 PE=1 SV=1	PRS4_HUMAN	49 kDa	8	11	0	0
3	26S protease regulatory subunit 6A OS=Homo sapiens GN=PSMC3 PE=1 SV=3	PRS6A_HUMAN	49 kDa	8	10	0	0
4	26S proteasome non-ATPase regulatory subunit 7 OS=Homo sapiens GN=PSMD7 PE=1 SV=2	PSMD7_HUMAN	37 kDa	2	3	0	0
5	26S proteasome non-ATPase regulatory subunit 8 OS=Homo sapiens GN=PSMD8 PE=1 SV=2	PSMD8_HUMAN	40 kDa	3	5	0	0
6	26S proteasome non-ATPase regulatory subunit 11 OS=Homo sapiens GN=PSMD11 PE=1 SV=3	PSD11_HUMAN	47 kDa	6	9	0	1
7	26S proteasome non-ATPase regulatory subunit 12 OS=Homo sapiens GN=PSMD12 PE=1 SV=3	PSD12_HUMAN	53 kDa	7	7	0	0
8	26S proteasome non-ATPase regulatory subunit 13 OS=Homo sapiens GN=PSMD13 PE=1 SV=2	PSD13_HUMAN	43 kDa	5	6	0	0
9	28S ribosomal protein S15, mitochondrial OS=Homo sapiens GN=MRPS15 PE=1 SV=1	RT15_HUMAN	30 kDa	1	2	0	0
10	28S ribosomal protein S16, mitochondrial OS=Homo sapiens GN=MRPS16 PE=1 SV=1	RT16_HUMAN	15 kDa	2	1	0	1
11	39S ribosomal protein L4, mitochondrial OS=Homo sapiens GN=MRPL4 PE=1 SV=1	RM04_HUMAN	35 kDa	3	1	0	0
12	39S ribosomal protein L9, mitochondrial OS=Homo sapiens GN=MRPL9 PE=1 SV=2	RM09_HUMAN	30 kDa	1	2	0	0
13	39S ribosomal protein L13, mitochondrial OS=Homo sapiens GN=MRPL13 PE=1 SV=1	RM13_HUMAN	21 kDa	0	2	0	0
14	39S ribosomal protein L22, mitochondrial OS=Homo sapiens GN=MRPL22 PE=1 SV=1	RM22_HUMAN	24 kDa	1	3	0	0
15	39S ribosomal protein L43, mitochondrial OS=Homo sapiens GN=MRPL43 PE=1 SV=1	RM43_HUMAN	23 kDa	2	1	0	0
16	39S ribosomal protein L47, mitochondrial OS=Homo sapiens GN=MRPL47 PE=1 SV=2	RM47_HUMAN	29 kDa	2	2	0	0
17	39S ribosomal protein L50, mitochondrial OS=Homo sapiens GN=MRPL50 PE=1 SV=2	RM50_HUMAN	18 kDa	1	2	0	0
18	39S ribosomal protein L55, mitochondrial OS=Homo sapiens GN=MRPL55 PE=1 SV=1	RM55_HUMAN	15 kDa	2	2	0	0
19	ATP synthase subunit O, mitochondrial OS=Homo sapiens GN=ATP5O PE=1 SV=1	ATPO_HUMAN	23 kDa	4	3	0	0
20	ATP-dependent zinc metalloprotease YME1L1 OS=Homo sapiens GN=YME1L1 PE=1 SV=2	YMEL1_HUMAN	86 kDa	7	12	0	0
21	Acidic leucine-rich nuclear phosphoprotein 32 family member A OS=Homo sapiens GN=ANP32A PE=1 SV=1	AN32A_HUMAN	29 kDa	0	3	0	0
22	Activating molecule in BECN1-regulated autophagy protein 1 OS=Homo sapiens GN=AMBRA1 PE=1 SV=2	AMRA1_HUMAN	143 kDa	0	5	0	0
23	Acylglycerol kinase, mitochondrial OS=Homo sapiens GN=AGK PE=1 SV=2	AGK_HUMAN	47 kDa	6	10	0	0
24	Bcl-2-associated transcription factor 1 OS=Homo sapiens GN=BCLAF1 PE=1 SV=2	BCLF1_HUMAN	106 kDa	2	3	0	0
25	Bifunctional methylenetetrahydrofolate dehydrogenase/cyclohydrolase, mitochondrial OS=Homo sapiens GN=MTHFD2 PE=1 SV=2	MTDC_HUMAN	38 kDa	2	0	0	0
26	Box C/D snoRNA protein 1 OS=Homo sapiens GN=ZNHIT6 PE=1 SV=1	BCD1_HUMAN	54 kDa	6	3	0	0
27	CD2 antigen cytoplasmic tail-binding protein 2 OS=Homo sapiens GN=CD2BP2 PE=1 SV=1	CD2B2_HUMAN	38 kDa	3	1	0	0
28	Calcineurin B homologous protein 1 OS=Homo sapiens GN=CHP1 PE=1 SV=3	CHP1_HUMAN	22 kDa	2	4	0	0
29	Cluster of Calcium-binding mitochondrial carrier protein Aralar2 OS=Homo sapiens GN=SLC25A13 PE=1 SV=2 (CMC2_HUMAN)	CMC2_HUMAN [2]	74 kDa	5	2	0	0
30	Calmodulin OS=Homo sapiens GN=CALM1 PE=1 SV=2	CALM_HUMAN	17 kDa	2	4	0	0
31	Calmodulin-like protein 3 OS=Homo sapiens GN=CALML3 PE=1 SV=2	CALL3_HUMAN	17 kDa	0	1	0	0
32	Calponin-2 OS=Homo sapiens GN=CNN2 PE=1 SV=4	CNN2_HUMAN	34 kDa	2	0	0	0
33	Carboxypeptidase A4 OS=Homo sapiens GN=CPA4 PE=1 SV=2	CBPA4_HUMAN	47 kDa	0	1	0	0
34	Casein kinase I isoform alpha OS=Homo sapiens GN=CSNK1A1 PE=1 SV=2	KC1A_HUMAN	39 kDa	2	2	0	0
35	Casein kinase I isoform delta OS=Homo sapiens GN=CSNK1D PE=1 SV=2	KC1D_HUMAN	47 kDa	0	2	0	0
36	Cluster of Casein kinase II subunit alpha OS=Homo sapiens GN=CSNK2A1 PE=1 SV=1 (CSK21_HUMAN)	CSK21_HUMAN [2]	45 kDa	10	7	0	0
37	Casein kinase II subunit alpha' OS=Homo sapiens GN=CSNK2A2 PE=1 SV=1	CSK22_HUMAN	41 kDa	9	6	0	0
38	Casein kinase II subunit beta OS=Homo sapiens GN=CSNK2B PE=1 SV=1	CSK2B_HUMAN	25 kDa	6	7	0	0
39	Catenin alpha-1 OS=Homo sapiens GN=CTNNA1 PE=1 SV=1	CTNA1_HUMAN	100 kDa	3	2	0	1
40	Coatomer subunit epsilon OS=Homo sapiens GN=COPE PE=1 SV=3	COPE_HUMAN	34 kDa	2	2	0	0
41	Coiled-coil domain-containing protein 47 OS=Homo sapiens GN=CCDC47 PE=1 SV=1	CCD47_HUMAN	56 kDa	1	2	0	0
42	Cystatin-SN OS=Homo sapiens GN=CST1 PE=1 SV=3	CYTN_HUMAN	16 kDa	2	0	0	0
43	Cytochrome b-c1 complex subunit 2, mitochondrial OS=Homo sapiens GN=UQCRC2 PE=1 SV=3	QCR2_HUMAN	48 kDa	6	5	0	0
44	Cytochrome b-c1 complex subunit 6, mitochondrial OS=Homo sapiens GN=UQCRH PE=1 SV=2	QCR6_HUMAN	11 kDa	2	2	0	0
45	Cytochrome c1, heme protein, mitochondrial OS=Homo sapiens GN=CYC1 PE=1 SV=3	CY1_HUMAN	35 kDa	5	6	0	0
46	Cytochrome c oxidase subunit 2 OS=Homo sapiens GN=MT-CO2 PE=1 SV=1	COX2_HUMAN	26 kDa	2	3	0	0
47	Cytosolic Fe-S cluster assembly factor NUBP2 OS=Homo sapiens GN=NUBP2 PE=1 SV=1	NUBP2_HUMAN	29 kDa	2	4	0	0
48	D-3-phosphoglycerate dehydrogenase OS=Homo sapiens GN=PHGDH PE=1 SV=4	SERA_HUMAN	57 kDa	0	4	0	0
49	DNA replication licensing factor MCM3 OS=Homo sapiens GN=MCM3 PE=1 SV=3	MCM3_HUMAN	91 kDa	3	0	0	0
50	DNA replication licensing factor MCM7 OS=Homo sapiens GN=MCM7 PE=1 SV=4	MCM7_HUMAN	81 kDa	5	2	0	0
51	DNA-directed RNA polymerase I subunit RPA49 OS=Homo sapiens GN=POLR1E PE=1 SV=2	RPA49_HUMAN	54 kDa	3	2	0	0
52	Deleted in malignant brain tumors 1 protein OS=Homo sapiens GN=DMBT1 PE=1 SV=2	DMBT1_HUMAN	261 kDa	0	2	0	0
53	DnaJ homolog subfamily B member 2 OS=Homo sapiens GN=DNAJB2 PE=1 SV=3	DNJB2_HUMAN	36 kDa	1	2	0	0
54	DnaJ homolog subfamily B member 4 OS=Homo sapiens GN=DNAJB4 PE=1 SV=1	DNJB4_HUMAN	38 kDa	2	0	0	0
55	DnaJ homolog subfamily B member 5 OS=Homo sapiens GN=DNAJB5 PE=1 SV=1	DNJB5_HUMAN	39 kDa	2	1	0	0
56	Cluster of DnaJ homolog subfamily B member 6 OS=Homo sapiens GN=DNAJB6 PE=1 SV=2 (DNJB6_HUMAN)	DNJB6_HUMAN [2]	36 kDa	4	5	0	0
57	DnaJ homolog subfamily C member 7 OS=Homo sapiens GN=DNAJC7 PE=1 SV=2	DNJC7_HUMAN	56 kDa	1	2	0	0
58	Dolichyl-diphosphooligosaccharide--protein glycosyltransferase subunit 2 OS=Homo sapiens GN=RPN2 PE=1 SV=3	RPN2_HUMAN	69 kDa	1	2	0	2
59	Drebrin OS=Homo sapiens GN=DBN1 PE=1 SV=4	DREB_HUMAN	71 kDa	0	2	0	0
60	Emerin OS=Homo sapiens GN=EMD PE=1 SV=1	EMD_HUMAN	29 kDa	2	2	0	0
61	Endoplasmic reticulum resident protein 29 OS=Homo sapiens GN=ERP29 PE=1 SV=4	ERP29_HUMAN	29 kDa	1	3	0	0
62	Cluster of Erlin-1 OS=Homo sapiens GN=ERLIN1 PE=1 SV=1 (ERLN1_HUMAN)	ERLN1_HUMAN [2]	39 kDa	1	3	0	0
63	Eukaryotic translation initiation factor 4E OS=Homo sapiens GN=EIF4E PE=1 SV=2	IF4E_HUMAN	25 kDa	1	3	0	0
64	Eukaryotic translation initiation factor 5 OS=Homo sapiens GN=EIF5 PE=1 SV=2	IF5_HUMAN	49 kDa	1	2	0	0
65	Exosome complex component CSL4 OS=Homo sapiens GN=EXOSC1 PE=1 SV=1	EXOS1_HUMAN	21 kDa	1	3	0	0
66	F-box only protein 3 OS=Homo sapiens GN=FBXO3 PE=1 SV=3	FBX3_HUMAN	55 kDa	2	1	0	0
67	FAS-associated factor 2 OS=Homo sapiens GN=FAF2 PE=1 SV=2	FAF2_HUMAN	53 kDa	2	2	0	0
68	GPN-loop GTPase 1 OS=Homo sapiens GN=GPN1 PE=1 SV=1	GPN1_HUMAN	42 kDa	2	0	0	0
69	GTP-binding nuclear protein Ran OS=Homo sapiens GN=RAN PE=1 SV=3	RAN_HUMAN	24 kDa	1	2	0	0
70	General transcription factor 3C polypeptide 5 OS=Homo sapiens GN=GTF3C5 PE=1 SV=2	TF3C5_HUMAN	60 kDa	1	2	0	0
71	General transcription factor II-I OS=Homo sapiens GN=GTF2I PE=1 SV=2	GTF2I_HUMAN	112 kDa	0	2	0	0
72	Glioma tumor suppressor candidate region gene 2 protein OS=Homo sapiens GN=GLTSCR2 PE=1 SV=2	GSCR2_HUMAN	54 kDa	1	2	0	0
73	Glutaminyl-peptide cyclotransferase-like protein OS=Homo sapiens GN=QPCTL PE=1 SV=2	QPCTL_HUMAN	43 kDa	2	2	0	0
74	H/ACA ribonucleoprotein complex subunit 1 OS=Homo sapiens GN=GAR1 PE=1 SV=1	GAR1_HUMAN	22 kDa	1	2	0	0
75	H/ACA ribonucleoprotein complex subunit 2 OS=Homo sapiens GN=NHP2 PE=1 SV=1	NHP2_HUMAN	17 kDa	2	1	0	0
76	Cluster of Histone deacetylase 2 OS=Homo sapiens GN=HDAC2 PE=1 SV=2 (HDAC2_HUMAN)	HDAC2_HUMAN [2]	55 kDa	1	4	0	0
77	Importin-7 OS=Homo sapiens GN=IPO7 PE=1 SV=1	IPO7_HUMAN	120 kDa	1	3	0	0
78	Keratin, type II cuticular Hb2 OS=Homo sapiens GN=KRT82 PE=1 SV=3	KRT82_HUMAN	57 kDa	2	1	0	2
79	Kinesin-like protein KIF1B OS=Homo sapiens GN=KIF1B PE=1 SV=5	KIF1B_HUMAN	204 kDa	0	2	0	0
80	Kinesin-like protein KIF24 OS=Homo sapiens GN=KIF24 PE=1 SV=2	KIF24_HUMAN	152 kDa	2	2	0	0
81	La-related protein 4B OS=Homo sapiens GN=LARP4B PE=1 SV=3	LAR4B_HUMAN	81 kDa	4	0	0	0
82	Large proline-rich protein BAG6 OS=Homo sapiens GN=BAG6 PE=1 SV=2	BAG6_HUMAN	119 kDa	4	11	0	0
83	Luc7-like protein 3 OS=Homo sapiens GN=LUC7L3 PE=1 SV=2	LC7L3_HUMAN	51 kDa	4	4	0	1
84	M-phase phosphoprotein 9 OS=Homo sapiens GN=MPHOSPH9 PE=1 SV=3	MPP9_HUMAN	116 kDa	0	2	0	0
85	Melanoma antigen preferentially expressed in tumors OS=Homo sapiens GN=PRAME PE=1 SV=1	PRAME_HUMAN	58 kDa	2	3	0	0
86	Membrane-associated progesterone receptor component 1 OS=Homo sapiens GN=PGRMC1 PE=1 SV=3	PGRC1_HUMAN	22 kDa	0	2	0	0
87	Metalloproteinase inhibitor 1 OS=Homo sapiens GN=TIMP1 PE=1 SV=1	TIMP1_HUMAN	23 kDa	1	2	0	0
88	Methyl-CpG-binding domain protein 3 OS=Homo sapiens GN=MBD3 PE=1 SV=1	MBD3_HUMAN	33 kDa	2	0	0	0
89	Mitochondrial carrier homolog 2 OS=Homo sapiens GN=MTCH2 PE=1 SV=1	MTCH2_HUMAN	33 kDa	1	2	0	0
90	Mitochondrial dicarboxylate carrier OS=Homo sapiens GN=SLC25A10 PE=1 SV=2	DIC_HUMAN	31 kDa	2	2	0	0
91	Mitochondrial import inner membrane translocase subunit TIM16 OS=Homo sapiens GN=PAM16 PE=1 SV=2	TIM16_HUMAN	14 kDa	2	2	0	0
92	Mitochondrial import inner membrane translocase subunit TIM50 OS=Homo sapiens GN=TIMM50 PE=1 SV=2	TIM50_HUMAN	40 kDa	4	4	0	0
93	Mitochondrial import inner membrane translocase subunit Tim21 OS=Homo sapiens GN=TIMM21 PE=1 SV=1	TIM21_HUMAN	28 kDa	0	2	0	0
94	Cluster of Mitochondrial import inner membrane translocase subunit Tim23 OS=Homo sapiens GN=TIMM23 PE=1 SV=1 (TIM23_HUMAN)	TIM23_HUMAN [2]	22 kDa	3	4	0	0
95	Mitochondrial import receptor subunit TOM22 homolog OS=Homo sapiens GN=TOMM22 PE=1 SV=3	TOM22_HUMAN	16 kDa	1	4	0	0
96	Myeloid leukemia factor 2 OS=Homo sapiens GN=MLF2 PE=1 SV=1	MLF2_HUMAN	28 kDa	3	3	0	0
97	NADH dehydrogenase [ubiquinone] 1 alpha subcomplex subunit 5 OS=Homo sapiens GN=NDUFA5 PE=1 SV=3	NDUA5_HUMAN	13 kDa	1	2	0	0
98	NADH dehydrogenase [ubiquinone] 1 alpha subcomplex subunit 13 OS=Homo sapiens GN=NDUFA13 PE=1 SV=3	NDUAD_HUMAN	17 kDa	0	3	0	0
99	NADH dehydrogenase [ubiquinone] 1 beta subcomplex subunit 4 OS=Homo sapiens GN=NDUFB4 PE=1 SV=3	NDUB4_HUMAN	15 kDa	2	2	0	0
100	NADH dehydrogenase [ubiquinone] iron-sulfur protein 2, mitochondrial OS=Homo sapiens GN=NDUFS2 PE=1 SV=2	NDUS2_HUMAN	53 kDa	1	3	0	0
101	NADH dehydrogenase [ubiquinone] iron-sulfur protein 3, mitochondrial OS=Homo sapiens GN=NDUFS3 PE=1 SV=1	NDUS3_HUMAN	30 kDa	1	2	0	0
102	Cluster of Nuclear envelope pore membrane protein POM 121 OS=Homo sapiens GN=POM121 PE=1 SV=2 (P121A_HUMAN)	P121A_HUMAN [2]	128 kDa	0	2	0	0
103	Nucleolar protein 16 OS=Homo sapiens GN=NOP16 PE=1 SV=2	NOP16_HUMAN	21 kDa	3	2	0	0
104	Nucleoplasmin-3 OS=Homo sapiens GN=NPM3 PE=1 SV=3	NPM3_HUMAN	19 kDa	2	3	0	0
105	Nucleosome assembly protein 1-like 4 OS=Homo sapiens GN=NAP1L4 PE=1 SV=1	NP1L4_HUMAN	43 kDa	2	4	0	0
106	Pachytene checkpoint protein 2 homolog OS=Homo sapiens GN=TRIP13 PE=1 SV=2	PCH2_HUMAN	49 kDa	1	2	0	0
107	Peptidyl-prolyl cis-trans isomerase H OS=Homo sapiens GN=PPIH PE=1 SV=1	PPIH_HUMAN	19 kDa	0	2	0	0
108	Periodic tryptophan protein 1 homolog OS=Homo sapiens GN=PWP1 PE=1 SV=1	PWP1_HUMAN	56 kDa	2	1	0	0
109	Peroxiredoxin-6 OS=Homo sapiens GN=PRDX6 PE=1 SV=3	PRDX6_HUMAN	25 kDa	1	2	0	0
110	Phosphate carrier protein, mitochondrial OS=Homo sapiens GN=SLC25A3 PE=1 SV=2	MPCP_HUMAN	40 kDa	3	3	0	1
111	Poly(A) RNA polymerase, mitochondrial OS=Homo sapiens GN=MTPAP PE=1 SV=1	PAPD1_HUMAN	66 kDa	1	2	0	0
112	Poly(ADP-ribose) glycohydrolase ARH3 OS=Homo sapiens GN=ADPRHL2 PE=1 SV=1	ARHL2_HUMAN	39 kDa	3	3	0	0
113	Pre-mRNA 3'-end-processing factor FIP1 OS=Homo sapiens GN=FIP1L1 PE=1 SV=1	FIP1_HUMAN	67 kDa	4	0	0	0
114	Prefoldin subunit 2 OS=Homo sapiens GN=PFDN2 PE=1 SV=1	PFD2_HUMAN	17 kDa	0	2	0	0
115	Probable ATP-dependent RNA helicase DDX56 OS=Homo sapiens GN=DDX56 PE=1 SV=1	DDX56_HUMAN	62 kDa	4	3	0	1
116	Programmed cell death protein 6 OS=Homo sapiens GN=PDCD6 PE=1 SV=1	PDCD6_HUMAN	22 kDa	0	2	0	0
117	Proline-, glutamic acid- and leucine-rich protein 1 OS=Homo sapiens GN=PELP1 PE=1 SV=2	PELP1_HUMAN	120 kDa	3	3	0	0
118	Proteasome subunit alpha type-1 OS=Homo sapiens GN=PSMA1 PE=1 SV=1	PSA1_HUMAN	30 kDa	3	6	0	0
119	Proteasome subunit alpha type-3 OS=Homo sapiens GN=PSMA3 PE=1 SV=2	PSA3_HUMAN	28 kDa	3	5	0	0
120	Proteasome subunit alpha type-5 OS=Homo sapiens GN=PSMA5 PE=1 SV=3	PSA5_HUMAN	26 kDa	5	8	0	0
121	Proteasome subunit alpha type-6 OS=Homo sapiens GN=PSMA6 PE=1 SV=1	PSA6_HUMAN	27 kDa	6	9	0	0
122	Cluster of Proteasome subunit alpha type-7 OS=Homo sapiens GN=PSMA7 PE=1 SV=1 (PSA7_HUMAN)	PSA7_HUMAN [2]	28 kDa	3	8	0	0
123	Proteasome subunit beta type-1 OS=Homo sapiens GN=PSMB1 PE=1 SV=2	PSB1_HUMAN	26 kDa	7	8	0	0
124	Proteasome subunit beta type-4 OS=Homo sapiens GN=PSMB4 PE=1 SV=4	PSB4_HUMAN	29 kDa	6	7	0	0
125	Proteasome subunit beta type-5 OS=Homo sapiens GN=PSMB5 PE=1 SV=3	PSB5_HUMAN	28 kDa	6	8	0	0
126	Protein AATF OS=Homo sapiens GN=AATF PE=1 SV=1	AATF_HUMAN	63 kDa	4	1	0	0
127	Protein LSM14 homolog A OS=Homo sapiens GN=LSM14A PE=1 SV=3	LS14A_HUMAN	51 kDa	2	2	0	0
128	Protein mago nashi homolog 2 OS=Homo sapiens GN=MAGOHB PE=1 SV=1	MGN2_HUMAN (+1)	17 kDa	2	1	0	1
129	Protein syndesmos OS=Homo sapiens GN=NUDT16L1 PE=1 SV=1	SDOS_HUMAN	23 kDa	1	4	0	0
130	Protein transport protein Sec61 subunit beta OS=Homo sapiens GN=SEC61B PE=1 SV=2	SC61B_HUMAN	10 kDa	2	2	0	0
131	Pumilio homolog 2 OS=Homo sapiens GN=PUM2 PE=1 SV=2	PUM2_HUMAN	114 kDa	2	0	0	0
132	Cluster of Putative cytochrome b-c1 complex subunit Rieske-like protein 1 OS=Homo sapiens GN=UQCRFS1P1 PE=5 SV=1 (UCRIL_HUMAN)	UCRIL_HUMAN [2]	31 kDa	1	2	0	0
133	Putative methyltransferase NSUN5 OS=Homo sapiens GN=NSUN5 PE=1 SV=2	NSUN5_HUMAN	47 kDa	2	1	0	0
134	RNA 3'-terminal phosphate cyclase OS=Homo sapiens GN=RTCA PE=1 SV=1	RTCA_HUMAN	39 kDa	3	0	0	0
135	RNA-binding protein 5 OS=Homo sapiens GN=RBM5 PE=1 SV=2	RBM5_HUMAN	92 kDa	2	0	0	0
136	RNA-binding protein 25 OS=Homo sapiens GN=RBM25 PE=1 SV=3	RBM25_HUMAN	100 kDa	3	1	0	0
137	RNA-binding protein 28 OS=Homo sapiens GN=RBM28 PE=1 SV=3	RBM28_HUMAN	86 kDa	2	2	0	0
138	RNA-binding protein 42 OS=Homo sapiens GN=RBM42 PE=1 SV=1	RBM42_HUMAN	50 kDa	2	1	0	0
139	Ras-related protein Rab-18 OS=Homo sapiens GN=RAB18 PE=1 SV=1	RAB18_HUMAN	23 kDa	1	2	0	0
140	Replication protein A 14 kDa subunit OS=Homo sapiens GN=RPA3 PE=1 SV=1	RFA3_HUMAN	14 kDa	1	1	0	2
141	Reticulocalbin-1 OS=Homo sapiens GN=RCN1 PE=1 SV=1	RCN1_HUMAN	39 kDa	3	3	0	0
142	Ribonucleoside-diphosphate reductase subunit M2 OS=Homo sapiens GN=RRM2 PE=1 SV=1	RIR2_HUMAN	45 kDa	3	0	0	0
143	Cluster of Ribose-phosphate pyrophosphokinase 2 OS=Homo sapiens GN=PRPS2 PE=1 SV=2 (PRPS2_HUMAN)	PRPS2_HUMAN [2]	35 kDa	2	1	0	0
144	Ribosomal RNA-processing protein 7 homolog A OS=Homo sapiens GN=RRP7A PE=1 SV=2	RRP7A_HUMAN	32 kDa	3	1	0	0
145	Ribosome biogenesis regulatory protein homolog OS=Homo sapiens GN=RRS1 PE=1 SV=2	RRS1_HUMAN	41 kDa	2	2	0	1
146	Sequestosome-1 OS=Homo sapiens GN=SQSTM1 PE=1 SV=1	SQSTM_HUMAN	48 kDa	1	2	0	0
147	Serine palmitoyltransferase 2 OS=Homo sapiens GN=SPTLC2 PE=1 SV=1	SPTC2_HUMAN	63 kDa	2	1	0	0
148	Cluster of Serine/threonine-protein phosphatase 2A 56 kDa regulatory subunit epsilon isoform OS=Homo sapiens GN=PPP2R5E PE=1 SV=1 (2A5E_HUMAN)	2A5E_HUMAN [2]	55 kDa	2	0	0	0
149	Sideroflexin-3 OS=Homo sapiens GN=SFXN3 PE=1 SV=2	SFXN3_HUMAN	36 kDa	2	3	0	0
150	Signal peptidase complex catalytic subunit SEC11A OS=Homo sapiens GN=SEC11A PE=1 SV=1	SC11A_HUMAN	21 kDa	0	2	0	0
151	Signal recognition particle receptor subunit beta OS=Homo sapiens GN=SRPRB PE=1 SV=3	SRPRB_HUMAN	30 kDa	1	5	0	0
152	Cluster of Sodium/potassium-transporting ATPase subunit alpha-1 OS=Homo sapiens GN=ATP1A1 PE=1 SV=1 (AT1A1_HUMAN)	AT1A1_HUMAN [3]	113 kDa	0	2	0	0
153	Cluster of Spliceosome RNA helicase DDX39B OS=Homo sapiens GN=DDX39B PE=1 SV=1 (DX39B_HUMAN)	DX39B_HUMAN [2]	49 kDa	2	2	0	0
154	Splicing factor 3A subunit 1 OS=Homo sapiens GN=SF3A1 PE=1 SV=1	SF3A1_HUMAN	89 kDa	2	1	0	0
155	Splicing factor 3A subunit 3 OS=Homo sapiens GN=SF3A3 PE=1 SV=1	SF3A3_HUMAN	59 kDa	5	3	0	0
156	Splicing factor 3B subunit 4 OS=Homo sapiens GN=SF3B4 PE=1 SV=1	SF3B4_HUMAN	44 kDa	4	3	0	0
157	Structural maintenance of chromosomes protein 1A OS=Homo sapiens GN=SMC1A PE=1 SV=2	SMC1A_HUMAN	143 kDa	1	4	0	0
158	Transcription elongation factor B polypeptide 1 OS=Homo sapiens GN=TCEB1 PE=1 SV=1	ELOC_HUMAN	12 kDa	2	3	0	0
159	Transcription elongation regulator 1 OS=Homo sapiens GN=TCERG1 PE=1 SV=2	TCRG1_HUMAN	124 kDa	2	2	0	0
160	Cluster of Transforming protein RhoA OS=Homo sapiens GN=RHOA PE=1 SV=1 (RHOA_HUMAN)	RHOA_HUMAN [3]	22 kDa	0	3	0	1
161	Translocon-associated protein subunit delta OS=Homo sapiens GN=SSR4 PE=1 SV=1	SSRD_HUMAN	19 kDa	1	2	0	0
162	U4/U6 small nuclear ribonucleoprotein Prp4 OS=Homo sapiens GN=PRPF4 PE=1 SV=2	PRP4_HUMAN	58 kDa	1	2	0	0
163	U4/U6 small nuclear ribonucleoprotein Prp31 OS=Homo sapiens GN=PRPF31 PE=1 SV=2	PRP31_HUMAN	55 kDa	0	2	0	0
164	U5 small nuclear ribonucleoprotein 40 kDa protein OS=Homo sapiens GN=SNRNP40 PE=1 SV=1	SNR40_HUMAN	39 kDa	2	0	0	0
165	Ubiquitin carboxyl-terminal hydrolase 7 OS=Homo sapiens GN=USP7 PE=1 SV=2	UBP7_HUMAN	128 kDa	3	8	0	0
166	Uncharacterized protein C9orf114 OS=Homo sapiens GN=C9orf114 PE=1 SV=3	CI114_HUMAN	42 kDa	3	1	0	0
167	Uncharacterized protein CXorf67 OS=Homo sapiens GN=CXorf67 PE=2 SV=1	CX067_HUMAN	52 kDa	3	3	0	0
168	Vesicle-associated membrane protein-associated protein A OS=Homo sapiens GN=VAPA PE=1 SV=3	VAPA_HUMAN	28 kDa	1	2	0	0
169	Vesicle-trafficking protein SEC22b OS=Homo sapiens GN=SEC22B PE=1 SV=4	SC22B_HUMAN	25 kDa	0	2	0	0
170	YTH domain-containing family protein 2 OS=Homo sapiens GN=YTHDF2 PE=1 SV=2	YTHD2_HUMAN	62 kDa	3	2	0	0
171	Yae1 domain-containing protein 1 OS=Homo sapiens GN=YAE1D1 PE=1 SV=1	YAED1_HUMAN	25 kDa	1	3	0	0
172	Zinc finger CCCH domain-containing protein 15 OS=Homo sapiens GN=ZC3H15 PE=1 SV=1	ZC3HF_HUMAN	49 kDa	2	1	0	0
173	Zinc finger CCHC domain-containing protein 8 OS=Homo sapiens GN=ZCCHC8 PE=1 SV=2	ZCHC8_HUMAN	79 kDa	2	0	0	0
174	Translation machinery-associated protein 16 OS=Homo sapiens GN=TMA16 PE=1 SV=2	TMA16_HUMAN	24 kDa	1	2	0	0
175	La-related protein 7 OS=Homo sapiens GN=LARP7 PE=1 SV=1	LARP7_HUMAN	67 kDa	3	0	0	0
176	Mitochondrial inner membrane protein OS=Homo sapiens GN=IMMT PE=1 SV=1	IMMT_HUMAN	84 kDa	2	0	0	0
177	NADH dehydrogenase [ubiquinone] 1 alpha subcomplex subunit 4 OS=Homo sapiens GN=NDUFA4 PE=1 SV=1	NDUA4_HUMAN	9 kDa	1	2	0	0
178	Golgin subfamily A member 2 OS=Homo sapiens GN=GOLGA2 PE=1 SV=3	GOGA2_HUMAN	113 kDa	0	2	0	0
179	RNA-binding protein 27 OS=Homo sapiens GN=RBM27 PE=1 SV=2	RBM27_HUMAN	119 kDa	0	2	0	0
180	Lamin-B1 OS=Homo sapiens GN=LMNB1 PE=1 SV=2	LMNB1_HUMAN	66 kDa	2	0	0	0
181	Regulator of microtubule dynamics protein 3 OS=Homo sapiens GN=RMDN3 PE=1 SV=2	RMD3_HUMAN	52 kDa	1	2	0	0
182	Prolyl 4-hydroxylase subunit alpha-1 OS=Homo sapiens GN=P4HA1 PE=1 SV=2	P4HA1_HUMAN	61 kDa	0	4	0	0
183	Coiled-coil domain-containing protein 86 OS=Homo sapiens GN=CCDC86 PE=1 SV=1	CCD86_HUMAN	40 kDa	0	2	0	1
184	Tubulin gamma-1 chain OS=Homo sapiens GN=TUBG1 PE=1 SV=2	TBG1_HUMAN	51 kDa	2	2	0	0
185	Protein RRP5 homolog OS=Homo sapiens GN=PDCD11 PE=1 SV=3	RRP5_HUMAN	209 kDa	0	0	0	5
186	NADH dehydrogenase [ubiquinone] 1 alpha subcomplex subunit 9, mitochondrial OS=Homo sapiens GN=NDUFA9 PE=1 SV=2	NDUA9_HUMAN	43 kDa	2	3	0	0
187	General transcription factor 3C polypeptide 3 OS=Homo sapiens GN=GTF3C3 PE=1 SV=1	TF3C3_HUMAN	101 kDa	0	0	0	3
188	Cancer/testis antigen family 45 member A5 OS=Homo sapiens GN=CT45A5 PE=2 SV=1	CT455_HUMAN	21 kDa	3	2	0	0
189	T-complex protein 1 subunit eta OS=Homo sapiens GN=CCT7 PE=1 SV=2	TCPH_HUMAN	59 kDa	5	5	0	1
190	RNA pseudouridylate synthase domain-containing protein 3 OS=Homo sapiens GN=RPUSD3 PE=1 SV=3	RUSD3_HUMAN	38 kDa	2	0	0	0
191	Cell division control protein 6 homolog OS=Homo sapiens GN=CDC6 PE=1 SV=1	CDC6_HUMAN	63 kDa	5	2	0	0
192	Eukaryotic translation initiation factor 4H OS=Homo sapiens GN=EIF4H PE=1 SV=5	IF4H_HUMAN	27 kDa	0	2	0	0
193	DNA mismatch repair protein Msh6 OS=Homo sapiens GN=MSH6 PE=1 SV=2	MSH6_HUMAN	153 kDa	1	2	0	0
194	Splicing factor U2AF 35 kDa subunit OS=Homo sapiens GN=U2AF1 PE=1 SV=3	U2AF1_HUMAN	28 kDa	3	3	0	0
195	Sorcin OS=Homo sapiens GN=SRI PE=1 SV=1	SORCN_HUMAN	22 kDa	0	2	0	0
196	Protein LAP2 OS=Homo sapiens GN=ERBB2IP PE=1 SV=2	LAP2_HUMAN	158 kDa	0	2	0	0
197	Gamma-glutamylcyclotransferase OS=Homo sapiens GN=GGCT PE=1 SV=1	GGCT_HUMAN	21 kDa	1	1	0	0
198	Transmembrane emp24 domain-containing protein 10 OS=Homo sapiens GN=TMED10 PE=1 SV=2	TMEDA_HUMAN	25 kDa	1	3	0	0
199	Fatty aldehyde dehydrogenase OS=Homo sapiens GN=ALDH3A2 PE=1 SV=1	AL3A2_HUMAN	55 kDa	3	3	0	0
200	39S ribosomal protein L17, mitochondrial OS=Homo sapiens GN=MRPL17 PE=1 SV=1	RM17_HUMAN	20 kDa	2	1	0	0
201	Serpin H1 OS=Homo sapiens GN=SERPINH1 PE=1 SV=2	SERPH_HUMAN	46 kDa	4	4	0	0
202	Far upstream element-binding protein 3 OS=Homo sapiens GN=FUBP3 PE=1 SV=2	FUBP3_HUMAN	62 kDa	1	1	0	0
203	Glial fibrillary acidic protein OS=Homo sapiens GN=GFAP PE=1 SV=1	GFAP_HUMAN	50 kDa	2	1	0	1
204	Myosin-10 OS=Homo sapiens GN=MYH10 PE=1 SV=3	MYH10_HUMAN	229 kDa	0	3	0	0
205	Guanine nucleotide-binding protein subunit alpha-12 OS=Homo sapiens GN=GNA12 PE=1 SV=4	GNA12_HUMAN	44 kDa	2	0	0	0
206	Proteasome subunit beta type-2 OS=Homo sapiens GN=PSMB2 PE=1 SV=1	PSB2_HUMAN	23 kDa	2	2	0	0
207	Target of EGR1 protein 1 OS=Homo sapiens GN=TOE1 PE=1 SV=1	TOE1_HUMAN	57 kDa	2	3	0	0
208	RNA-binding protein 8A OS=Homo sapiens GN=RBM8A PE=1 SV=1	RBM8A_HUMAN	20 kDa	1	2	0	0
209	60S ribosome subunit biogenesis protein NIP7 homolog OS=Homo sapiens GN=NIP7 PE=1 SV=1	NIP7_HUMAN	20 kDa	2	4	0	1
210	Gasdermin-A OS=Homo sapiens GN=GSDMA PE=1 SV=4	GSDMA_HUMAN	49 kDa	0	3	0	0
211	SWI/SNF-related matrix-associated actin-dependent regulator of chromatin subfamily D member 1 OS=Homo sapiens GN=SMARCD1 PE=1 SV=2	SMRD1_HUMAN	58 kDa	3	8	0	1
212	Proteasome subunit beta type-6 OS=Homo sapiens GN=PSMB6 PE=1 SV=4	PSB6_HUMAN	25 kDa	3	4	0	0
213	39S ribosomal protein L48, mitochondrial OS=Homo sapiens GN=MRPL48 PE=1 SV=2	RM48_HUMAN	24 kDa	2	2	0	0
214	Cluster of Ras-related protein Rab-1B OS=Homo sapiens GN=RAB1B PE=1 SV=1 (RAB1B_HUMAN)	RAB1B_HUMAN [11]	22 kDa	0	3	0	0
215	PERQ amino acid-rich with GYF domain-containing protein 2 OS=Homo sapiens GN=GIGYF2 PE=1 SV=1	PERQ2_HUMAN	150 kDa	5	3	0	0
216	Transmembrane protein 43 OS=Homo sapiens GN=TMEM43 PE=1 SV=1	TMM43_HUMAN	45 kDa	7	9	0	0
217	Cleavage and polyadenylation specificity factor subunit 7 OS=Homo sapiens GN=CPSF7 PE=1 SV=1	CPSF7_HUMAN	52 kDa	4	3	0	0
218	Polyadenylate-binding protein-interacting protein 1 OS=Homo sapiens GN=PAIP1 PE=1 SV=1	PAIP1_HUMAN	54 kDa	1	3	0	0
219	SPATS2-like protein OS=Homo sapiens GN=SPATS2L PE=1 SV=2	SPS2L_HUMAN	62 kDa	2	2	0	1
220	39S ribosomal protein L18, mitochondrial OS=Homo sapiens GN=MRPL18 PE=1 SV=1	RM18_HUMAN	21 kDa	1	2	0	0
221	DNA-directed RNA polymerase II subunit RPB7 OS=Homo sapiens GN=POLR2G PE=1 SV=1	RPB7_HUMAN	19 kDa	3	2	0	1
222	Cluster of Serine/threonine-protein phosphatase 2A 55 kDa regulatory subunit B alpha isoform OS=Homo sapiens GN=PPP2R2A PE=1 SV=1 (2ABA_HUMAN)	2ABA_HUMAN [3]	52 kDa	2	1	0	0
223	Paraspeckle component 1 OS=Homo sapiens GN=PSPC1 PE=1 SV=1	PSPC1_HUMAN	59 kDa	3	1	0	0
224	Fatty acid-binding protein, epidermal OS=Homo sapiens GN=FABP5 PE=1 SV=3	FABP5_HUMAN	15 kDa	1	2	0	1
225	T-complex protein 1 subunit epsilon OS=Homo sapiens GN=CCT5 PE=1 SV=1	TCPE_HUMAN	60 kDa	2	5	0	1
226	26S proteasome non-ATPase regulatory subunit 3 OS=Homo sapiens GN=PSMD3 PE=1 SV=2	PSMD3_HUMAN	61 kDa	7	11	0	1
227	Importin subunit alpha-4 OS=Homo sapiens GN=KPNA3 PE=1 SV=2	IMA4_HUMAN	58 kDa	4	4	0	1
228	Cluster of Nucleoside diphosphate kinase B OS=Homo sapiens GN=NME2 PE=1 SV=1 (NDKB_HUMAN)	NDKB_HUMAN [2]	17 kDa	1	2	0	0
229	Keratin, type I cytoskeletal 23 OS=Homo sapiens GN=KRT23 PE=1 SV=2	K1C23_HUMAN	48 kDa	2	1	0	1
230	Catalase OS=Homo sapiens GN=CAT PE=1 SV=3	CATA_HUMAN	60 kDa	1	1	0	3
231	Protein disulfide-isomerase A3 OS=Homo sapiens GN=PDIA3 PE=1 SV=4	PDIA3_HUMAN	57 kDa	2	5	0	0
232	SWI/SNF-related matrix-associated actin-dependent regulator of chromatin subfamily D member 2 OS=Homo sapiens GN=SMARCD2 PE=1 SV=3	SMRD2_HUMAN	59 kDa	6	10	0	1
233	Keratin, type I cytoskeletal 18 OS=Homo sapiens GN=KRT18 PE=1 SV=2	K1C18_HUMAN	48 kDa	6	7	0	0
234	Proteasome subunit beta type-3 OS=Homo sapiens GN=PSMB3 PE=1 SV=2	PSB3_HUMAN	23 kDa	3	4	0	0
235	T-complex protein 1 subunit alpha OS=Homo sapiens GN=TCP1 PE=1 SV=1	TCPA_HUMAN	60 kDa	0	2	0	2
236	28S ribosomal protein S17, mitochondrial OS=Homo sapiens GN=MRPS17 PE=2 SV=1	RT17_HUMAN	15 kDa	1	3	0	0
237	Eukaryotic translation initiation factor 3 subunit D OS=Homo sapiens GN=EIF3D PE=1 SV=1	EIF3D_HUMAN	64 kDa	7	3	0	0
238	Calmodulin-like protein 5 OS=Homo sapiens GN=CALML5 PE=1 SV=2	CALL5_HUMAN	16 kDa	1	2	0	0
239	Cluster of ATPase family AAA domain-containing protein 3A OS=Homo sapiens GN=ATAD3A PE=1 SV=2 (ATD3A_HUMAN)	ATD3A_HUMAN [3]	71 kDa	12	9	0	1
240	26S proteasome non-ATPase regulatory subunit 1 OS=Homo sapiens GN=PSMD1 PE=1 SV=2	PSMD1_HUMAN	106 kDa	9	5	0	0
241	26S proteasome non-ATPase regulatory subunit 2 OS=Homo sapiens GN=PSMD2 PE=1 SV=3	PSMD2_HUMAN	100 kDa	8	11	0	0
242	BPI fold-containing family B member 1 OS=Homo sapiens GN=BPIFB1 PE=1 SV=1	BPIB1_HUMAN	52 kDa	0	2	0	0
243	Deoxyuridine 5'-triphosphate nucleotidohydrolase, mitochondrial OS=Homo sapiens GN=DUT PE=1 SV=4	DUT_HUMAN	27 kDa	0	1	0	0
244	Desmocollin-1 OS=Homo sapiens GN=DSC1 PE=1 SV=2	DSC1_HUMAN	100 kDa	3	2	0	3
245	Cluster of Ig kappa chain V-III region SIE OS=Homo sapiens PE=1 SV=1 (KV302_HUMAN)	KV302_HUMAN [3]	12 kDa	0	1	0	0
246	Nucleolar protein 58 OS=Homo sapiens GN=NOP58 PE=1 SV=1	NOP58_HUMAN	60 kDa	5	6	0	1
247	T-complex protein 1 subunit beta OS=Homo sapiens GN=CCT2 PE=1 SV=4	TCPB_HUMAN	57 kDa	6	11	0	2
248	T-complex protein 1 subunit theta OS=Homo sapiens GN=CCT8 PE=1 SV=4	TCPQ_HUMAN	60 kDa	5	8	0	2
249	Ig lambda-2 chain C regions OS=Homo sapiens GN=IGLC2 PE=1 SV=1	LAC2_HUMAN	11 kDa	0	1	0	0
250	Glutathione S-transferase P OS=Homo sapiens GN=GSTP1 PE=1 SV=2	GSTP1_HUMAN	23 kDa	2	4	0	0
251	T-complex protein 1 subunit delta OS=Homo sapiens GN=CCT4 PE=1 SV=4	TCPD_HUMAN	58 kDa	4	9	0	1
252	Protein POF1B OS=Homo sapiens GN=POF1B PE=1 SV=3	POF1B_HUMAN	68 kDa	1	1	0	0
253	Myosin regulatory light chain 12B OS=Homo sapiens GN=MYL12B PE=1 SV=2	ML12B_HUMAN	20 kDa	4	5	0	2
254	Splicing factor U2AF 65 kDa subunit OS=Homo sapiens GN=U2AF2 PE=1 SV=4	U2AF2_HUMAN	54 kDa	9	10	0	1
255	T-complex protein 1 subunit zeta OS=Homo sapiens GN=CCT6A PE=1 SV=3	TCPZ_HUMAN	58 kDa	7	10	0	0
256	Statherin OS=Homo sapiens GN=STATH PE=1 SV=2	STAT_HUMAN	7 kDa	0	1	0	1
257	Cluster of Glycogen phosphorylase, muscle form OS=Homo sapiens GN=PYGM PE=1 SV=6 (PYGM_HUMAN)	PYGM_HUMAN [3]	97 kDa	1	0	0	0
258	Cluster of Ig gamma-1 chain C region OS=Homo sapiens GN=IGHG1 PE=1 SV=1 (IGHG1_HUMAN)	IGHG1_HUMAN [3]	36 kDa	2	2	0	0
259	Prelamin-A/C OS=Homo sapiens GN=LMNA PE=1 SV=1	LMNA_HUMAN	74 kDa	2	1	0	0
260	Transgelin-2 OS=Homo sapiens GN=TAGLN2 PE=1 SV=3	TAGL2_HUMAN	22 kDa	1	4	0	0
261	Cluster of Keratin, type I cuticular Ha1 OS=Homo sapiens GN=KRT31 PE=2 SV=3 (K1H1_HUMAN)	K1H1_HUMAN [9]	47 kDa	3	0	0	10
262	Creatine kinase M-type OS=Homo sapiens GN=CKM PE=1 SV=2	KCRM_HUMAN	43 kDa	0	0	0	3
263	Protein S100-A8 OS=Homo sapiens GN=S100A8 PE=1 SV=1	S10A8_HUMAN	11 kDa	0	1	0	0
264	Protein disulfide-isomerase OS=Homo sapiens GN=P4HB PE=1 SV=3	PDIA1_HUMAN	57 kDa	4	5	0	1
265	Cluster of Sarcoplasmic/endoplasmic reticulum calcium ATPase 2 OS=Homo sapiens GN=ATP2A2 PE=1 SV=1 (AT2A2_HUMAN)	AT2A2_HUMAN [2]	115 kDa	0	1	0	1
266	Galectin-7 OS=Homo sapiens GN=LGALS7 PE=1 SV=2	LEG7_HUMAN	15 kDa	1	2	0	1
267	Ig alpha-1 chain C region OS=Homo sapiens GN=IGHA1 PE=1 SV=2	IGHA1_HUMAN	38 kDa	1	2	0	0
268	Protein S100-A9 OS=Homo sapiens GN=S100A9 PE=1 SV=1	S10A9_HUMAN	13 kDa	2	2	0	0
269	60 kDa heat shock protein, mitochondrial OS=Homo sapiens GN=HSPD1 PE=1 SV=2	CH60_HUMAN	61 kDa	6	12	0	2
270	Ig kappa chain C region OS=Homo sapiens GN=IGKC PE=1 SV=1	IGKC_HUMAN	12 kDa	2	3	0	0
271	S-phase kinase-associated protein 2 OS=Homo sapiens GN=SKP2 PE=1 SV=2	SKP2_HUMAN	48 kDa	0	0	0	1
272	G2/mitotic-specific cyclin-B1 OS=Homo sapiens GN=CCNB1 PE=1 SV=1	CCNB1_HUMAN	48 kDa	0	0	0	6
273	Cluster of Cyclin-A2 OS=Homo sapiens GN=CCNA2 PE=1 SV=2 (CCNA2_HUMAN)	CCNA2_HUMAN [2]	49 kDa	0	0	0	5
274	Ribosome biogenesis protein WDR12 OS=Homo sapiens GN=WDR12 PE=1 SV=2	WDR12_HUMAN	48 kDa	2	0	0	0
275	Cluster of Serine/threonine-protein phosphatase 2A 65 kDa regulatory subunit A alpha isoform OS=Homo sapiens GN=PPP2R1A PE=1 SV=4 (2AAA_HUMAN)	2AAA_HUMAN [2]	65 kDa	4	5	0	0
276	Cathepsin D OS=Homo sapiens GN=CTSD PE=1 SV=1	CATD_HUMAN	45 kDa	0	1	0	0
277	Kelch-like protein 12 OS=Homo sapiens GN=KLHL12 PE=1 SV=2	KLH12_HUMAN	63 kDa	2	2	0	2
278	Nascent polypeptide-associated complex subunit alpha, muscle-specific form OS=Homo sapiens GN=NACA PE=1 SV=1	NACAM_HUMAN	205 kDa	1	3	0	0
279	Plakophilin-1 OS=Homo sapiens GN=PKP1 PE=1 SV=2	PKP1_HUMAN	83 kDa	0	0	0	2
280	Laminin subunit gamma-2 OS=Homo sapiens GN=LAMC2 PE=1 SV=2	LAMC2_HUMAN	131 kDa	0	2	0	0
281	DnaJ homolog subfamily B member 1 OS=Homo sapiens GN=DNAJB1 PE=1 SV=4	DNJB1_HUMAN	38 kDa	3	1	0	0
282	Sarcoplasmic/endoplasmic reticulum calcium ATPase 1 OS=Homo sapiens GN=ATP2A1 PE=1 SV=1	AT2A1_HUMAN	110 kDa	0	1	0	1
283	Importin subunit alpha-3 OS=Homo sapiens GN=KPNA4 PE=1 SV=1	IMA3_HUMAN	58 kDa	3	3	0	0
284	T-complex protein 1 subunit gamma OS=Homo sapiens GN=CCT3 PE=1 SV=4	TCPG_HUMAN	61 kDa	3	5	0	2
285	Putative oxidoreductase GLYR1 OS=Homo sapiens GN=GLYR1 PE=1 SV=3	GLYR1_HUMAN	61 kDa	3	3	0	0
286	Cell division cycle and apoptosis regulator protein 1 OS=Homo sapiens GN=CCAR1 PE=1 SV=2	CCAR1_HUMAN	133 kDa	2	10	0	0
287	DNA polymerase delta catalytic subunit OS=Homo sapiens GN=POLD1 PE=1 SV=2	DPOD1_HUMAN	124 kDa	0	5	0	0
288	Dihydrolipoyllysine-residue succinyltransferase component of 2-oxoglutarate dehydrogenase complex, mitochondrial OS=Homo sapiens GN=DLST PE=1 SV=4	ODO2_HUMAN	49 kDa	3	1	0	0
289	Testis-specific Y-encoded-like protein 5 OS=Homo sapiens GN=TSPYL5 PE=1 SV=2	TSYL5_HUMAN	45 kDa	3	3	0	0
290	RNA-binding protein 45 OS=Homo sapiens GN=RBM45 PE=2 SV=1	RBM45_HUMAN	54 kDa	2	1	0	0
291	Protein SET OS=Homo sapiens GN=SET PE=1 SV=3	SET_HUMAN	33 kDa	2	1	0	0
292	Metalloproteinase inhibitor 2 OS=Homo sapiens GN=TIMP2 PE=1 SV=2	TIMP2_HUMAN	24 kDa	2	3	0	1
293	UPF0488 protein C8orf33 OS=Homo sapiens GN=C8orf33 PE=1 SV=1	CH033_HUMAN	25 kDa	0	2	0	0
294	Zinc finger protein 318 OS=Homo sapiens GN=ZNF318 PE=1 SV=2	ZN318_HUMAN	251 kDa	3	8	0	0
295	Cluster of 26S proteasome non-ATPase regulatory subunit 4 OS=Homo sapiens GN=PSMD4 PE=1 SV=1 (PSMD4_HUMAN)	PSMD4_HUMAN [2]	41 kDa	4	4	0	0
296	rRNA 2'-O-methyltransferase fibrillarin OS=Homo sapiens GN=FBL PE=1 SV=2	FBRL_HUMAN	34 kDa	4	3	0	1
297	Proteasome subunit alpha type-4 OS=Homo sapiens GN=PSMA4 PE=1 SV=1	PSA4_HUMAN	29 kDa	3	5	0	0
298	39S ribosomal protein L45, mitochondrial OS=Homo sapiens GN=MRPL45 PE=1 SV=2	RM45_HUMAN	35 kDa	2	1	0	0
299	Peroxidasin homolog OS=Homo sapiens GN=PXDN PE=1 SV=2	PXDN_HUMAN	165 kDa	4	2	0	0
300	SURP and G-patch domain-containing protein 2 OS=Homo sapiens GN=SUGP2 PE=1 SV=2	SUGP2_HUMAN	120 kDa	1	3	0	0
301	Trifunctional enzyme subunit beta, mitochondrial OS=Homo sapiens GN=HADHB PE=1 SV=3	ECHB_HUMAN	51 kDa	5	5	0	0
302	39S ribosomal protein L44, mitochondrial OS=Homo sapiens GN=MRPL44 PE=1 SV=1	RM44_HUMAN	38 kDa	2	1	0	0
303	DNA-dependent protein kinase catalytic subunit OS=Homo sapiens GN=PRKDC PE=1 SV=3	PRKDC_HUMAN	469 kDa	0	3	0	2
304	26S protease regulatory subunit 8 OS=Homo sapiens GN=PSMC5 PE=1 SV=1	PRS8_HUMAN	46 kDa	10	12	0	0
305	Pre-mRNA-processing factor 6 OS=Homo sapiens GN=PRPF6 PE=1 SV=1	PRP6_HUMAN	107 kDa	2	0	0	0
306	Protein-L-isoaspartate(D-aspartate) O-methyltransferase OS=Homo sapiens GN=PCMT1 PE=1 SV=4	PIMT_HUMAN	25 kDa	3	4	0	0
307	Microtubule-associated protein 1B OS=Homo sapiens GN=MAP1B PE=1 SV=2	MAP1B_HUMAN	271 kDa	1	5	0	0
308	Leucine-rich repeat-containing protein 59 OS=Homo sapiens GN=LRRC59 PE=1 SV=1	LRC59_HUMAN	35 kDa	2	2	0	0
309	Epiplakin OS=Homo sapiens GN=EPPK1 PE=1 SV=2	EPIPL_HUMAN	556 kDa	2	0	0	3
310	CCAAT/enhancer-binding protein zeta OS=Homo sapiens GN=CEBPZ PE=1 SV=3	CEBPZ_HUMAN	121 kDa	5	7	0	0
311	FH1/FH2 domain-containing protein 1 OS=Homo sapiens GN=FHOD1 PE=1 SV=3	FHOD1_HUMAN	127 kDa	0	4	0	0
312	Zinc-alpha-2-glycoprotein OS=Homo sapiens GN=AZGP1 PE=1 SV=2	ZA2G_HUMAN	34 kDa	0	1	0	0
313	Aminoacyl tRNA synthase complex-interacting multifunctional protein 1 OS=Homo sapiens GN=AIMP1 PE=1 SV=2	AIMP1_HUMAN	34 kDa	4	2	0	0
314	Growth factor receptor-bound protein 2 OS=Homo sapiens GN=GRB2 PE=1 SV=1	GRB2_HUMAN	25 kDa	1	0	0	0
315	Calcium homeostasis endoplasmic reticulum protein OS=Homo sapiens GN=CHERP PE=1 SV=3	CHERP_HUMAN	104 kDa	3	3	0	0
316	Cluster of Scaffold attachment factor B1 OS=Homo sapiens GN=SAFB PE=1 SV=4 (SAFB1_HUMAN)	SAFB1_HUMAN [2]	103 kDa	5	4	0	0
317	FACT complex subunit SPT16 OS=Homo sapiens GN=SUPT16H PE=1 SV=1	SP16H_HUMAN	120 kDa	1	6	0	5
318	Cluster of Chromobox protein homolog 3 OS=Homo sapiens GN=CBX3 PE=1 SV=4 (CBX3_HUMAN)	CBX3_HUMAN [2]	21 kDa	2	3	0	0
319	Structural maintenance of chromosomes protein 2 OS=Homo sapiens GN=SMC2 PE=1 SV=2	SMC2_HUMAN	136 kDa	3	4	0	0
320	U3 small nucleolar ribonucleoprotein protein MPP10 OS=Homo sapiens GN=MPHOSPH10 PE=1 SV=2	MPP10_HUMAN	79 kDa	2	0	0	0
321	DNA dC->dU-editing enzyme APOBEC-3C OS=Homo sapiens GN=APOBEC3C PE=1 SV=2	ABC3C_HUMAN	23 kDa	2	2	0	0
322	Dynactin subunit 1 OS=Homo sapiens GN=DCTN1 PE=1 SV=3	DCTN1_HUMAN	142 kDa	1	6	0	0
323	Zinc finger CCCH domain-containing protein 18 OS=Homo sapiens GN=ZC3H18 PE=1 SV=2	ZCH18_HUMAN	106 kDa	3	2	0	0
324	26S protease regulatory subunit 7 OS=Homo sapiens GN=PSMC2 PE=1 SV=3	PRS7_HUMAN	49 kDa	9	12	0	0
325	Pre-mRNA-processing-splicing factor 8 OS=Homo sapiens GN=PRPF8 PE=1 SV=2	PRP8_HUMAN	274 kDa	1	1	0	7
326	Exosome complex component MTR3 OS=Homo sapiens GN=EXOSC6 PE=1 SV=1	EXOS6_HUMAN	28 kDa	0	2	0	0
327	Cyclin-dependent kinase 1 OS=Homo sapiens GN=CDK1 PE=1 SV=3	CDK1_HUMAN	34 kDa	0	3	0	0
328	Protein FAM207A OS=Homo sapiens GN=FAM207A PE=1 SV=2	F207A_HUMAN	25 kDa	2	3	0	0
329	E3 ubiquitin-protein ligase UBR5 OS=Homo sapiens GN=UBR5 PE=1 SV=2	UBR5_HUMAN	309 kDa	4	7	0	0
330	Cluster of Putative keratin-87 protein OS=Homo sapiens GN=KRT87P PE=5 SV=4 (KR87P_HUMAN)	KR87P_HUMAN [4]	29 kDa	5	4	0	8
331	Serine/threonine-protein phosphatase 2A catalytic subunit alpha isoform OS=Homo sapiens GN=PPP2CA PE=1 SV=1	PP2AA_HUMAN (+1)	36 kDa	2	2	0	1
332	Pre-mRNA-processing factor 19 OS=Homo sapiens GN=PRPF19 PE=1 SV=1	PRP19_HUMAN	55 kDa	3	6	0	3
333	Triosephosphate isomerase OS=Homo sapiens GN=TPI1 PE=1 SV=3	TPIS_HUMAN	31 kDa	4	4	0	0
334	Microtubule-actin cross-linking factor 1, isoforms 1/2/3/5 OS=Homo sapiens GN=MACF1 PE=1 SV=4	MACF1_HUMAN	838 kDa	0	0	0	3
335	Cytoplasmic dynein 1 heavy chain 1 OS=Homo sapiens GN=DYNC1H1 PE=1 SV=5	DYHC1_HUMAN	532 kDa	1	3	0	11
336	Filamin-B OS=Homo sapiens GN=FLNB PE=1 SV=2	FLNB_HUMAN	278 kDa	4	6	0	0
337	TBC1 domain family member 4 OS=Homo sapiens GN=TBC1D4 PE=1 SV=2	TBCD4_HUMAN	147 kDa	0	3	0	0
338	DnaJ homolog subfamily A member 3, mitochondrial OS=Homo sapiens GN=DNAJA3 PE=1 SV=2	DNJA3_HUMAN	52 kDa	2	1	0	0
339	AFG3-like protein 2 OS=Homo sapiens GN=AFG3L2 PE=1 SV=2	AFG32_HUMAN	89 kDa	1	2	0	1
340	Phosphoglycerate kinase 1 OS=Homo sapiens GN=PGK1 PE=1 SV=3	PGK1_HUMAN	45 kDa	0	1	0	0
341	Cluster of ADP-ribosylation factor 4 OS=Homo sapiens GN=ARF4 PE=1 SV=3 (ARF4_HUMAN)	ARF4_HUMAN [4]	21 kDa	3	4	0	0
342	Exosome complex component RRP41 OS=Homo sapiens GN=EXOSC4 PE=1 SV=3	EXOS4_HUMAN	26 kDa	2	3	0	0
343	Protein AHNAK2 OS=Homo sapiens GN=AHNAK2 PE=1 SV=2	AHNK2_HUMAN	617 kDa	0	0	0	2
344	Cluster of Vimentin OS=Homo sapiens GN=VIM PE=1 SV=4 (VIME_HUMAN)	VIME_HUMAN [2]	54 kDa	12	4	0	0
345	Titin OS=Homo sapiens GN=TTN PE=1 SV=4	TITIN_HUMAN	3816 kDa	1	1	0	0
346	Clathrin light chain A OS=Homo sapiens GN=CLTA PE=1 SV=1	CLCA_HUMAN	27 kDa	2	2	0	0
347	Cluster of Mitogen-activated protein kinase 1 OS=Homo sapiens GN=MAPK1 PE=1 SV=3 (MK01_HUMAN)	MK01_HUMAN [10]	41 kDa	0	0	0	1
348	Cluster of Myosin-7 OS=Homo sapiens GN=MYH7 PE=1 SV=5 (MYH7_HUMAN)	MYH7_HUMAN [9]	223 kDa	1	1	0	10
349	Proteasome subunit alpha type-2 OS=Homo sapiens GN=PSMA2 PE=1 SV=2	PSA2_HUMAN	26 kDa	6	8	0	0
350	14-3-3 protein sigma OS=Homo sapiens GN=SFN PE=1 SV=1	1433S_HUMAN	28 kDa	3	4	1	0
351	Double-stranded RNA-binding protein Staufen homolog 2 OS=Homo sapiens GN=STAU2 PE=1 SV=1	STAU2_HUMAN	63 kDa	3	2	1	2
352	Peroxiredoxin-2 OS=Homo sapiens GN=PRDX2 PE=1 SV=5	PRDX2_HUMAN	22 kDa	3	3	1	2
353	G1/S-specific cyclin-E1 OS=Homo sapiens GN=CCNE1 PE=1 SV=2	CCNE1_HUMAN	47 kDa	0	0	1	0
354	Importin subunit alpha-5 OS=Homo sapiens GN=KPNA1 PE=1 SV=3	IMA5_HUMAN	60 kDa	4	4	1	3
355	Cluster of ELAV-like protein 2 OS=Homo sapiens GN=ELAVL2 PE=1 SV=2 (ELAV2_HUMAN)	ELAV2_HUMAN [2]	40 kDa	4	1	1	0
356	Leucine zipper protein 1 OS=Homo sapiens GN=LUZP1 PE=1 SV=2	LUZP1_HUMAN	120 kDa	1	3	1	0
357	Cluster of Probable ubiquitin carboxyl-terminal hydrolase FAF-X OS=Homo sapiens GN=USP9X PE=1 SV=3 (USP9X_HUMAN)	USP9X_HUMAN [2]	292 kDa	1	2	1	0
358	Importin subunit alpha-7 OS=Homo sapiens GN=KPNA6 PE=1 SV=1	IMA7_HUMAN	60 kDa	3	5	1	1
359	Galactocerebrosidase OS=Homo sapiens GN=GALC PE=1 SV=2	GALC_HUMAN	77 kDa	3	1	1	0
360	28S ribosomal protein S6, mitochondrial OS=Homo sapiens GN=MRPS6 PE=1 SV=3	RT06_HUMAN	14 kDa	2	2	1	0
361	Fructose-bisphosphate aldolase A OS=Homo sapiens GN=ALDOA PE=1 SV=2	ALDOA_HUMAN	39 kDa	2	2	1	1
362	Bleomycin hydrolase OS=Homo sapiens GN=BLMH PE=1 SV=1	BLMH_HUMAN	53 kDa	1	4	1	0
363	Protein SEC13 homolog OS=Homo sapiens GN=SEC13 PE=1 SV=3	SEC13_HUMAN	36 kDa	2	1	1	0
364	Dystrophin OS=Homo sapiens GN=DMD PE=1 SV=3	DMD_HUMAN	427 kDa	2	1	1	0
365	Rho GDP-dissociation inhibitor 1 OS=Homo sapiens GN=ARHGDIA PE=1 SV=3	GDIR1_HUMAN	23 kDa	1	2	1	0
366	Splicing factor 1 OS=Homo sapiens GN=SF1 PE=1 SV=4	SF01_HUMAN	68 kDa	2	0	1	1
367	Pterin-4-alpha-carbinolamine dehydratase OS=Homo sapiens GN=PCBD1 PE=1 SV=2	PHS_HUMAN	12 kDa	1	2	1	1
368	Partitioning defective 3 homolog OS=Homo sapiens GN=PARD3 PE=1 SV=2	PARD3_HUMAN	151 kDa	4	4	1	0
369	Trypsin-3 OS=Homo sapiens GN=PRSS3 PE=1 SV=2	TRY3_HUMAN	33 kDa	2	2	1	1
370	Eukaryotic translation initiation factor 5A-1 OS=Homo sapiens GN=EIF5A PE=1 SV=2	IF5A1_HUMAN	17 kDa	0	2	1	1
371	Serine/threonine-protein phosphatase PGAM5, mitochondrial OS=Homo sapiens GN=PGAM5 PE=1 SV=2	PGAM5_HUMAN	32 kDa	4	4	1	0
372	3-hydroxyacyl-CoA dehydrogenase type-2 OS=Homo sapiens GN=HSD17B10 PE=1 SV=3	HCD2_HUMAN	27 kDa	2	3	1	0
373	Cluster of Ig mu chain C region OS=Homo sapiens GN=IGHM PE=1 SV=3 (IGHM_HUMAN)	IGHM_HUMAN [2]	49 kDa	0	0	1	1
374	26S protease regulatory subunit 10B OS=Homo sapiens GN=PSMC6 PE=1 SV=1	PRS10_HUMAN	44 kDa	10	8	1	0
375	Cluster of Melanoma-associated antigen 4 OS=Homo sapiens GN=MAGEA4 PE=1 SV=2 (MAGA4_HUMAN)	MAGA4_HUMAN [5]	35 kDa	8	7	1	0
376	Cluster of Cyclin-dependent kinase 2 OS=Homo sapiens GN=CDK2 PE=1 SV=2 (CDK2_HUMAN)	CDK2_HUMAN [2]	34 kDa	1	1	1	0
377	ATP synthase subunit f, mitochondrial OS=Homo sapiens GN=ATP5J2 PE=1 SV=3	ATPK_HUMAN	11 kDa	1	2	1	0
378	Bcl-2-like protein 1 OS=Homo sapiens GN=BCL2L1 PE=1 SV=1	B2CL1_HUMAN	26 kDa	1	1	1	0
379	Splicing factor 45 OS=Homo sapiens GN=RBM17 PE=1 SV=1	SPF45_HUMAN	45 kDa	2	3	1	0
380	RNMT-activating mini protein OS=Homo sapiens GN=FAM103A1 PE=1 SV=1	RAM_HUMAN	14 kDa	3	3	1	1
381	Suprabasin OS=Homo sapiens GN=SBSN PE=2 SV=2	SBSN_HUMAN	61 kDa	1	1	1	0
382	GTPase Era, mitochondrial OS=Homo sapiens GN=ERAL1 PE=1 SV=2	ERAL1_HUMAN	48 kDa	4	3	1	0
383	Nucleolar protein 6 OS=Homo sapiens GN=NOL6 PE=1 SV=2	NOL6_HUMAN	128 kDa	5	7	1	0
384	Inosine-5'-monophosphate dehydrogenase 2 OS=Homo sapiens GN=IMPDH2 PE=1 SV=2	IMDH2_HUMAN	56 kDa	5	8	1	3
385	Far upstream element-binding protein 2 OS=Homo sapiens GN=KHSRP PE=1 SV=4	FUBP2_HUMAN	73 kDa	2	0	1	0
386	Roquin-1 OS=Homo sapiens GN=RC3H1 PE=1 SV=1	RC3H1_HUMAN	126 kDa	3	4	1	1
387	Condensin complex subunit 1 OS=Homo sapiens GN=NCAPD2 PE=1 SV=3	CND1_HUMAN	157 kDa	0	2	1	0
388	Eukaryotic translation initiation factor 5B OS=Homo sapiens GN=EIF5B PE=1 SV=4	IF2P_HUMAN	139 kDa	5	9	1	0
389	4F2 cell-surface antigen heavy chain OS=Homo sapiens GN=SLC3A2 PE=1 SV=3	4F2_HUMAN	68 kDa	3	2	1	0
390	Protein LTV1 homolog OS=Homo sapiens GN=LTV1 PE=1 SV=1	LTV1_HUMAN	55 kDa	4	1	1	1
391	60S ribosomal protein L36a-like OS=Homo sapiens GN=RPL36AL PE=1 SV=3	RL36L_HUMAN	12 kDa	1	4	1	1
392	Fatty acid synthase OS=Homo sapiens GN=FASN PE=1 SV=3	FAS_HUMAN	273 kDa	0	3	1	8
393	Dimethyladenosine transferase 1, mitochondrial OS=Homo sapiens GN=TFB1M PE=1 SV=1	TFB1M_HUMAN	40 kDa	2	3	1	0
394	Transformer-2 protein homolog alpha OS=Homo sapiens GN=TRA2A PE=1 SV=1	TRA2A_HUMAN	33 kDa	3	1	1	0
395	Reticulocalbin-2 OS=Homo sapiens GN=RCN2 PE=1 SV=1	RCN2_HUMAN	37 kDa	7	7	1	0
396	28S ribosomal protein S5, mitochondrial OS=Homo sapiens GN=MRPS5 PE=1 SV=2	RT05_HUMAN	48 kDa	3	1	1	1
397	Transformer-2 protein homolog beta OS=Homo sapiens GN=TRA2B PE=1 SV=1	TRA2B_HUMAN	34 kDa	3	1	1	2
398	Heat shock 70 kDa protein 4 OS=Homo sapiens GN=HSPA4 PE=1 SV=4	HSP74_HUMAN	94 kDa	4	4	1	1
399	tRNA methyltransferase 112 homolog OS=Homo sapiens GN=TRMT112 PE=1 SV=1	TR112_HUMAN	14 kDa	1	3	1	0
400	Cluster of Myosin light polypeptide 6 OS=Homo sapiens GN=MYL6 PE=1 SV=2 (MYL6_HUMAN)	MYL6_HUMAN [2]	17 kDa	2	4	1	2
401	Very-long-chain (3R)-3-hydroxyacyl-[acyl-carrier protein] dehydratase 3 OS=Homo sapiens GN=PTPLAD1 PE=1 SV=2	HACD3_HUMAN	43 kDa	2	1	1	1
402	Protein-glutamine gamma-glutamyltransferase K OS=Homo sapiens GN=TGM1 PE=1 SV=4	TGM1_HUMAN	90 kDa	1	2	1	1
403	Protein PRRC2C OS=Homo sapiens GN=PRRC2C PE=1 SV=4	PRC2C_HUMAN	317 kDa	5	6	1	0
404	Proteasome subunit beta type-7 OS=Homo sapiens GN=PSMB7 PE=1 SV=1	PSB7_HUMAN	30 kDa	5	5	1	0
405	28S ribosomal protein S25, mitochondrial OS=Homo sapiens GN=MRPS25 PE=1 SV=1	RT25_HUMAN	20 kDa	0	0	1	2
406	DNA-directed RNA polymerases I, II, and III subunit RPABC3 OS=Homo sapiens GN=POLR2H PE=1 SV=4	RPAB3_HUMAN	17 kDa	3	3	1	1
407	Nuclear cap-binding protein subunit 2 OS=Homo sapiens GN=NCBP2 PE=1 SV=1	NCBP2_HUMAN	18 kDa	3	2	1	0
408	39S ribosomal protein L49, mitochondrial OS=Homo sapiens GN=MRPL49 PE=1 SV=1	RM49_HUMAN	19 kDa	3	3	1	1
409	Peptidyl-prolyl cis-trans isomerase B OS=Homo sapiens GN=PPIB PE=1 SV=2	PPIB_HUMAN	24 kDa	2	2	1	1
410	Protein S100-A7 OS=Homo sapiens GN=S100A7 PE=1 SV=4	S10A7_HUMAN	11 kDa	2	2	1	0
411	Cluster of Cofilin-1 OS=Homo sapiens GN=CFL1 PE=1 SV=3 (COF1_HUMAN)	COF1_HUMAN [2]	19 kDa	2	5	1	1
412	Importin subunit alpha-1 OS=Homo sapiens GN=KPNA2 PE=1 SV=1	IMA1_HUMAN	58 kDa	11	13	1	4
413	26S protease regulatory subunit 6B OS=Homo sapiens GN=PSMC4 PE=1 SV=2	PRS6B_HUMAN	47 kDa	6	10	1	1
414	Coronin-1C OS=Homo sapiens GN=CORO1C PE=1 SV=1	COR1C_HUMAN	53 kDa	1	1	1	3
415	DnaJ homolog subfamily A member 2 OS=Homo sapiens GN=DNAJA2 PE=1 SV=1	DNJA2_HUMAN	46 kDa	7	7	1	1
416	Histone-binding protein RBBP4 OS=Homo sapiens GN=RBBP4 PE=1 SV=3	RBBP4_HUMAN	48 kDa	3	4	1	1
417	RNA-binding motif, single-stranded-interacting protein 2 OS=Homo sapiens GN=RBMS2 PE=1 SV=1	RBMS2_HUMAN	44 kDa	2	2	1	0
418	Protein FAM98B OS=Homo sapiens GN=FAM98B PE=1 SV=1	FA98B_HUMAN	37 kDa	6	4	1	1
419	28S ribosomal protein S7, mitochondrial OS=Homo sapiens GN=MRPS7 PE=1 SV=2	RT07_HUMAN	28 kDa	5	7	1	0
420	28S ribosomal protein S26, mitochondrial OS=Homo sapiens GN=MRPS26 PE=1 SV=1	RT26_HUMAN	24 kDa	2	2	1	1
421	39S ribosomal protein L24, mitochondrial OS=Homo sapiens GN=MRPL24 PE=1 SV=1	RM24_HUMAN	25 kDa	1	2	1	0
422	39S ribosomal protein L28, mitochondrial OS=Homo sapiens GN=MRPL28 PE=1 SV=4	RM28_HUMAN	30 kDa	3	3	1	0
423	BAG family molecular chaperone regulator 2 OS=Homo sapiens GN=BAG2 PE=1 SV=1	BAG2_HUMAN	24 kDa	8	9	1	0
424	Elongation factor 1-beta OS=Homo sapiens GN=EEF1B2 PE=1 SV=3	EF1B_HUMAN	25 kDa	4	3	1	1
425	Pre-mRNA-splicing factor SPF27 OS=Homo sapiens GN=BCAS2 PE=1 SV=1	SPF27_HUMAN	26 kDa	3	3	1	1
426	Tricarboxylate transport protein, mitochondrial OS=Homo sapiens GN=SLC25A1 PE=1 SV=2	TXTP_HUMAN	34 kDa	3	5	1	0
427	DNA-directed RNA polymerases I, II, and III subunit RPABC1 OS=Homo sapiens GN=POLR2E PE=1 SV=4	RPAB1_HUMAN	25 kDa	4	4	1	2
428	U1 small nuclear ribonucleoprotein C OS=Homo sapiens GN=SNRPC PE=1 SV=1	RU1C_HUMAN	17 kDa	2	2	1	2
429	Spermatogenesis-associated protein 5 OS=Homo sapiens GN=SPATA5 PE=1 SV=3	SPAT5_HUMAN	98 kDa	3	1	1	0
430	Signal recognition particle 9 kDa protein OS=Homo sapiens GN=SRP9 PE=1 SV=2	SRP09_HUMAN	10 kDa	3	2	1	1
431	Splicing factor 3B subunit 6 OS=Homo sapiens GN=SF3B6 PE=1 SV=1	SF3B6_HUMAN	15 kDa	2	2	1	0
432	Cluster of 40S ribosomal protein S27 OS=Homo sapiens GN=RPS27 PE=1 SV=3 (RS27_HUMAN)	RS27_HUMAN [2]	9 kDa	4	4	1	2
433	Galectin-1 OS=Homo sapiens GN=LGALS1 PE=1 SV=2	LEG1_HUMAN	15 kDa	1	2	1	1
434	Thioredoxin-dependent peroxide reductase, mitochondrial OS=Homo sapiens GN=PRDX3 PE=1 SV=3	PRDX3_HUMAN	28 kDa	1	1	1	1
435	Cluster of B-cell CLL/lymphoma 7 protein family member C OS=Homo sapiens GN=BCL7C PE=1 SV=3 (BCL7C_HUMAN)	BCL7C_HUMAN [3]	23 kDa	2	2	1	0
436	Cluster of Talin-1 OS=Homo sapiens GN=TLN1 PE=1 SV=3 (TLN1_HUMAN)	TLN1_HUMAN [2]	270 kDa	0	1	1	1
437	39S ribosomal protein L41, mitochondrial OS=Homo sapiens GN=MRPL41 PE=1 SV=1	RM41_HUMAN	15 kDa	1	2	1	0
438	Cluster of KH domain-containing, RNA-binding, signal transduction-associated protein 1 OS=Homo sapiens GN=KHDRBS1 PE=1 SV=1 (KHDR1_HUMAN)	KHDR1_HUMAN [3]	48 kDa	6	5	1	3
439	Poly(U)-binding-splicing factor PUF60 OS=Homo sapiens GN=PUF60 PE=1 SV=1	PUF60_HUMAN	60 kDa	7	5	1	6
440	Elongation factor 2 OS=Homo sapiens GN=EEF2 PE=1 SV=4	EF2_HUMAN	95 kDa	3	3	1	1
441	Caspase-14 OS=Homo sapiens GN=CASP14 PE=1 SV=2	CASPE_HUMAN	28 kDa	4	6	1	1
442	Caveolin-1 OS=Homo sapiens GN=CAV1 PE=1 SV=4	CAV1_HUMAN	20 kDa	2	5	1	2
443	Mannosyl-oligosaccharide glucosidase OS=Homo sapiens GN=MOGS PE=1 SV=5	MOGS_HUMAN	92 kDa	2	1	1	0
444	Eukaryotic translation initiation factor 3 subunit K OS=Homo sapiens GN=EIF3K PE=1 SV=1	EIF3K_HUMAN	25 kDa	1	3	1	2
445	40S ribosomal protein S29 OS=Homo sapiens GN=RPS29 PE=1 SV=2	RS29_HUMAN	7 kDa	2	1	1	1
446	Protein-glutamine gamma-glutamyltransferase E OS=Homo sapiens GN=TGM3 PE=1 SV=4	TGM3_HUMAN	77 kDa	2	9	1	2
447	Elongation factor Tu, mitochondrial OS=Homo sapiens GN=TUFM PE=1 SV=2	EFTU_HUMAN	50 kDa	5	6	1	1
448	Dihydropteridine reductase OS=Homo sapiens GN=QDPR PE=1 SV=2	DHPR_HUMAN	26 kDa	3	1	1	0
449	Nesprin-1 OS=Homo sapiens GN=SYNE1 PE=1 SV=4	SYNE1_HUMAN	1011 kDa	1	0	1	0
450	Dolichol-phosphate mannosyltransferase subunit 1 OS=Homo sapiens GN=DPM1 PE=1 SV=1	DPM1_HUMAN	30 kDa	6	5	1	0
451	39S ribosomal protein L19, mitochondrial OS=Homo sapiens GN=MRPL19 PE=1 SV=2	RM19_HUMAN	34 kDa	1	4	1	1
452	Thyroid hormone receptor-associated protein 3 OS=Homo sapiens GN=THRAP3 PE=1 SV=2	TR150_HUMAN	109 kDa	4	4	1	0
453	28S ribosomal protein S2, mitochondrial OS=Homo sapiens GN=MRPS2 PE=1 SV=1	RT02_HUMAN	33 kDa	3	2	1	2
454	F-actin-capping protein subunit alpha-1 OS=Homo sapiens GN=CAPZA1 PE=1 SV=3	CAZA1_HUMAN	33 kDa	3	2	1	1
455	Eukaryotic translation initiation factor 3 subunit G OS=Homo sapiens GN=EIF3G PE=1 SV=2	EIF3G_HUMAN	36 kDa	4	5	1	0
456	Cluster of RNA-binding motif, single-stranded-interacting protein 1 OS=Homo sapiens GN=RBMS1 PE=1 SV=3 (RBMS1_HUMAN)	RBMS1_HUMAN [2]	45 kDa	3	2	1	1
457	Complement component 1 Q subcomponent-binding protein, mitochondrial OS=Homo sapiens GN=C1QBP PE=1 SV=1	C1QBP_HUMAN	31 kDa	8	7	1	1
458	Lysine--tRNA ligase OS=Homo sapiens GN=KARS PE=1 SV=3	SYK_HUMAN	68 kDa	4	2	1	1
459	Ribonuclease P protein subunit p30 OS=Homo sapiens GN=RPP30 PE=1 SV=1	RPP30_HUMAN	29 kDa	1	2	1	0
460	Tight junction protein ZO-2 OS=Homo sapiens GN=TJP2 PE=1 SV=2	ZO2_HUMAN	134 kDa	0	2	1	0
461	MAP7 domain-containing protein 1 OS=Homo sapiens GN=MAP7D1 PE=1 SV=1	MA7D1_HUMAN	93 kDa	3	3	1	0
462	Protein FAM91A1 OS=Homo sapiens GN=FAM91A1 PE=1 SV=3	F91A1_HUMAN	94 kDa	1	0	1	1
463	Proliferating cell nuclear antigen OS=Homo sapiens GN=PCNA PE=1 SV=1	PCNA_HUMAN	29 kDa	4	3	1	0
464	Death domain-associated protein 6 OS=Homo sapiens GN=DAXX PE=1 SV=2	DAXX_HUMAN	81 kDa	3	1	1	0
465	39S ribosomal protein L15, mitochondrial OS=Homo sapiens GN=MRPL15 PE=1 SV=1	RM15_HUMAN	33 kDa	3	2	1	0
466	Adenosylhomocysteinase OS=Homo sapiens GN=AHCY PE=1 SV=4	SAHH_HUMAN	48 kDa	0	1	1	0
467	ATP-dependent RNA helicase DDX24 OS=Homo sapiens GN=DDX24 PE=1 SV=1	DDX24_HUMAN	96 kDa	2	0	1	0
468	L-lactate dehydrogenase A chain OS=Homo sapiens GN=LDHA PE=1 SV=2	LDHA_HUMAN	37 kDa	2	5	1	1
469	U5 small nuclear ribonucleoprotein 200 kDa helicase OS=Homo sapiens GN=SNRNP200 PE=1 SV=2	U520_HUMAN	245 kDa	1	4	1	17
470	Protein FAM98A OS=Homo sapiens GN=FAM98A PE=1 SV=1	FA98A_HUMAN	55 kDa	8	7	1	4
471	Cluster of Serine/threonine-protein phosphatase PP1-alpha catalytic subunit OS=Homo sapiens GN=PPP1CA PE=1 SV=1 (PP1A_HUMAN)	PP1A_HUMAN [2]	38 kDa	10	5	1	0
472	Interferon-inducible double-stranded RNA-dependent protein kinase activator A OS=Homo sapiens GN=PRKRA PE=1 SV=1	PRKRA_HUMAN	34 kDa	5	2	1	2
473	Ras GTPase-activating protein-binding protein 2 OS=Homo sapiens GN=G3BP2 PE=1 SV=2	G3BP2_HUMAN	54 kDa	8	6	1	6
474	26S proteasome non-ATPase regulatory subunit 14 OS=Homo sapiens GN=PSMD14 PE=1 SV=1	PSDE_HUMAN	35 kDa	4	4	1	1
475	RuvB-like 2 OS=Homo sapiens GN=RUVBL2 PE=1 SV=3	RUVB2_HUMAN	51 kDa	11	8	1	1
476	Leucine--tRNA ligase, cytoplasmic OS=Homo sapiens GN=LARS PE=1 SV=2	SYLC_HUMAN	134 kDa	2	9	1	0
477	SWI/SNF-related matrix-associated actin-dependent regulator of chromatin subfamily B member 1 OS=Homo sapiens GN=SMARCB1 PE=1 SV=2	SNF5_HUMAN	44 kDa	3	4	1	2
478	Probable ATP-dependent RNA helicase DDX27 OS=Homo sapiens GN=DDX27 PE=1 SV=2	DDX27_HUMAN	90 kDa	3	0	1	1
479	Cleavage and polyadenylation specificity factor subunit 5 OS=Homo sapiens GN=NUDT21 PE=1 SV=1	CPSF5_HUMAN	26 kDa	4	5	1	0
480	Keratin, type II cytoskeletal 71 OS=Homo sapiens GN=KRT71 PE=1 SV=3	K2C71_HUMAN	57 kDa	2	1	2	3
481	Mitochondrial import receptor subunit TOM20 homolog OS=Homo sapiens GN=TOMM20 PE=1 SV=1	TOM20_HUMAN	16 kDa	2	1	2	0
482	ATP-dependent RNA helicase DDX50 OS=Homo sapiens GN=DDX50 PE=1 SV=1	DDX50_HUMAN	83 kDa	2	2	2	0
483	Eukaryotic translation initiation factor 2A OS=Homo sapiens GN=EIF2A PE=1 SV=3	EIF2A_HUMAN	65 kDa	5	5	2	6
484	Prolactin-inducible protein OS=Homo sapiens GN=PIP PE=1 SV=1	PIP_HUMAN	17 kDa	1	1	2	1
485	Thioredoxin OS=Homo sapiens GN=TXN PE=1 SV=3	THIO_HUMAN	12 kDa	4	4	2	0
486	Ribosomal L1 domain-containing protein 1 OS=Homo sapiens GN=RSL1D1 PE=1 SV=3	RL1D1_HUMAN	55 kDa	5	3	2	4
487	BAG family molecular chaperone regulator 4 OS=Homo sapiens GN=BAG4 PE=1 SV=1	BAG4_HUMAN	50 kDa	3	3	2	3
488	Fragile X mental retardation syndrome-related protein 2 OS=Homo sapiens GN=FXR2 PE=1 SV=2	FXR2_HUMAN	74 kDa	0	0	2	0
489	Heterogeneous nuclear ribonucleoprotein L OS=Homo sapiens GN=HNRNPL PE=1 SV=2	HNRPL_HUMAN	64 kDa	19	18	2	9
490	Eukaryotic initiation factor 4A-III OS=Homo sapiens GN=EIF4A3 PE=1 SV=4	IF4A3_HUMAN	47 kDa	3	3	2	2
491	U4/U6.U5 tri-snRNP-associated protein 1 OS=Homo sapiens GN=SART1 PE=1 SV=1	SNUT1_HUMAN	90 kDa	6	3	2	1
492	14-3-3 protein epsilon OS=Homo sapiens GN=YWHAE PE=1 SV=1	1433E_HUMAN	29 kDa	7	9	2	2
493	14-3-3 protein theta OS=Homo sapiens GN=YWHAQ PE=1 SV=1	1433T_HUMAN	28 kDa	9	10	2	0
494	Cluster of Endoplasmin OS=Homo sapiens GN=HSP90B1 PE=1 SV=1 (ENPL_HUMAN)	ENPL_HUMAN [2]	92 kDa	3	2	2	2
495	YTH domain-containing family protein 1 OS=Homo sapiens GN=YTHDF1 PE=1 SV=1	YTHD1_HUMAN	61 kDa	8	6	2	5
496	Protein arginine N-methyltransferase 1 OS=Homo sapiens GN=PRMT1 PE=1 SV=2	ANM1_HUMAN	42 kDa	1	2	2	7
497	Induced myeloid leukemia cell differentiation protein Mcl-1 OS=Homo sapiens GN=MCL1 PE=1 SV=3	MCL1_HUMAN	37 kDa	2	2	2	2
498	Cluster of Serine/arginine-rich splicing factor 10 OS=Homo sapiens GN=SRSF10 PE=1 SV=1 (SRS10_HUMAN)	SRS10_HUMAN [2]	31 kDa	4	3	2	0
499	Ataxin-2-like protein OS=Homo sapiens GN=ATXN2L PE=1 SV=2	ATX2L_HUMAN	113 kDa	2	4	2	0
500	28S ribosomal protein S31, mitochondrial OS=Homo sapiens GN=MRPS31 PE=1 SV=3	RT31_HUMAN	45 kDa	2	3	2	1
501	ATP-dependent DNA helicase Q4 OS=Homo sapiens GN=RECQL4 PE=1 SV=1	RECQ4_HUMAN	133 kDa	0	1	2	1
502	mRNA turnover protein 4 homolog OS=Homo sapiens GN=MRTO4 PE=1 SV=2	MRT4_HUMAN	28 kDa	2	3	2	0
503	Eukaryotic translation initiation factor 3 subunit L OS=Homo sapiens GN=EIF3L PE=1 SV=1	EIF3L_HUMAN	67 kDa	8	7	2	4
504	Melanoma-associated antigen D2 OS=Homo sapiens GN=MAGED2 PE=1 SV=2	MAGD2_HUMAN	65 kDa	5	2	2	2
505	Histone acetyltransferase type B catalytic subunit OS=Homo sapiens GN=HAT1 PE=1 SV=1	HAT1_HUMAN	50 kDa	3	3	2	2
506	Mitochondrial ribonuclease P protein 1 OS=Homo sapiens GN=TRMT10C PE=1 SV=2	MRRP1_HUMAN	47 kDa	2	0	2	0
507	Eukaryotic translation initiation factor 6 OS=Homo sapiens GN=EIF6 PE=1 SV=1	IF6_HUMAN	27 kDa	3	4	2	1
508	Partner of Y14 and mago OS=Homo sapiens GN=WIBG PE=1 SV=1	WIBG_HUMAN	23 kDa	5	5	2	1
509	Exosome complex component RRP40 OS=Homo sapiens GN=EXOSC3 PE=1 SV=3	EXOS3_HUMAN	30 kDa	3	2	2	0
510	Non-POU domain-containing octamer-binding protein OS=Homo sapiens GN=NONO PE=1 SV=4	NONO_HUMAN	54 kDa	8	12	2	8
511	DNA-directed RNA polymerase I subunit RPA1 OS=Homo sapiens GN=POLR1A PE=1 SV=2	RPA1_HUMAN	195 kDa	0	3	2	0
512	Probable rRNA-processing protein EBP2 OS=Homo sapiens GN=EBNA1BP2 PE=1 SV=2	EBP2_HUMAN	35 kDa	3	2	2	0
513	DnaJ homolog subfamily A member 1 OS=Homo sapiens GN=DNAJA1 PE=1 SV=2	DNJA1_HUMAN	45 kDa	6	7	2	1
514	Poly [ADP-ribose] polymerase 4 OS=Homo sapiens GN=PARP4 PE=1 SV=3	PARP4_HUMAN	193 kDa	0	4	2	15
515	28S ribosomal protein S34, mitochondrial OS=Homo sapiens GN=MRPS34 PE=1 SV=2	RT34_HUMAN	26 kDa	1	4	2	0
516	Exosome complex component RRP43 OS=Homo sapiens GN=EXOSC8 PE=1 SV=1	EXOS8_HUMAN	30 kDa	2	2	2	0
517	LINE-1 retrotransposable element ORF1 protein OS=Homo sapiens GN=L1RE1 PE=1 SV=1	LORF1_HUMAN	40 kDa	2	4	2	0
518	Eukaryotic translation initiation factor 2 subunit 2 OS=Homo sapiens GN=EIF2S2 PE=1 SV=2	IF2B_HUMAN	38 kDa	3	4	2	2
519	Cluster of Ubiquitin-40S ribosomal protein S27a OS=Homo sapiens GN=RPS27A PE=1 SV=2 (RS27A_HUMAN)	RS27A_HUMAN [3]	18 kDa	5	4	2	1
520	Probable ATP-dependent RNA helicase YTHDC2 OS=Homo sapiens GN=YTHDC2 PE=1 SV=2	YTDC2_HUMAN	160 kDa	0	1	2	1
521	Eukaryotic translation initiation factor 2 subunit 1 OS=Homo sapiens GN=EIF2S1 PE=1 SV=3	IF2A_HUMAN	36 kDa	4	5	2	4
522	Protein LSM14 homolog B OS=Homo sapiens GN=LSM14B PE=1 SV=1	LS14B_HUMAN	42 kDa	4	4	2	2
523	Signal recognition particle 14 kDa protein OS=Homo sapiens GN=SRP14 PE=1 SV=2	SRP14_HUMAN	15 kDa	3	5	2	1
524	Ubiquitin-associated protein 2 OS=Homo sapiens GN=UBAP2 PE=1 SV=1	UBAP2_HUMAN	117 kDa	0	0	2	1
525	Ribosomal RNA small subunit methyltransferase NEP1 OS=Homo sapiens GN=EMG1 PE=1 SV=4	NEP1_HUMAN	27 kDa	0	4	2	0
526	Structural maintenance of chromosomes protein 3 OS=Homo sapiens GN=SMC3 PE=1 SV=2	SMC3_HUMAN	142 kDa	2	7	2	0
527	Cluster of Serine/arginine-rich splicing factor 2 OS=Homo sapiens GN=SRSF2 PE=1 SV=4 (SRSF2_HUMAN)	SRSF2_HUMAN [2]	25 kDa	2	2	2	1
528	60S ribosomal protein L29 OS=Homo sapiens GN=RPL29 PE=1 SV=2	RL29_HUMAN	18 kDa	2	2	2	2
529	Collagen alpha-1(XII) chain OS=Homo sapiens GN=COL12A1 PE=1 SV=2	COCA1_HUMAN	333 kDa	0	1	2	12
530	RNA binding protein fox-1 homolog 2 OS=Homo sapiens GN=RBFOX2 PE=1 SV=3	RFOX2_HUMAN	41 kDa	3	2	2	2
531	Cluster of Tropomyosin beta chain OS=Homo sapiens GN=TPM2 PE=1 SV=1 (TPM2_HUMAN)	TPM2_HUMAN [4]	33 kDa	1	2	2	3
532	RuvB-like 1 OS=Homo sapiens GN=RUVBL1 PE=1 SV=1	RUVB1_HUMAN	50 kDa	6	4	2	3
533	Ras GTPase-activating-like protein IQGAP1 OS=Homo sapiens GN=IQGAP1 PE=1 SV=1	IQGA1_HUMAN	189 kDa	0	0	2	1
534	Pentatricopeptide repeat domain-containing protein 3, mitochondrial OS=Homo sapiens GN=PTCD3 PE=1 SV=3	PTCD3_HUMAN	79 kDa	0	0	2	2
535	Zinc finger protein ubi-d4 OS=Homo sapiens GN=DPF2 PE=1 SV=2	REQU_HUMAN	44 kDa	3	4	2	2
536	Profilin-1 OS=Homo sapiens GN=PFN1 PE=1 SV=2	PROF1_HUMAN	15 kDa	3	4	2	2
537	Corneodesmosin OS=Homo sapiens GN=CDSN PE=1 SV=3	CDSN_HUMAN	52 kDa	1	1	2	2
538	60S ribosomal protein L35a OS=Homo sapiens GN=RPL35A PE=1 SV=2	RL35A_HUMAN	13 kDa	1	1	2	3
539	YLP motif-containing protein 1 OS=Homo sapiens GN=YLPM1 PE=1 SV=3	YLPM1_HUMAN	220 kDa	9	12	2	0
540	Ribosomal RNA processing protein 1 homolog B OS=Homo sapiens GN=RRP1B PE=1 SV=3	RRP1B_HUMAN	84 kDa	1	0	2	1
541	Pre-mRNA-processing factor 40 homolog A OS=Homo sapiens GN=PRPF40A PE=1 SV=2	PR40A_HUMAN	109 kDa	6	7	2	0
542	Mitotic checkpoint protein BUB3 OS=Homo sapiens GN=BUB3 PE=1 SV=1	BUB3_HUMAN	37 kDa	2	1	2	0
543	Annexin A5 OS=Homo sapiens GN=ANXA5 PE=1 SV=2	ANXA5_HUMAN	36 kDa	4	7	2	0
544	DNA-directed RNA polymerase II subunit RPB3 OS=Homo sapiens GN=POLR2C PE=1 SV=2	RPB3_HUMAN	31 kDa	4	3	2	0
545	DBIRD complex subunit ZNF326 OS=Homo sapiens GN=ZNF326 PE=1 SV=2	ZN326_HUMAN	66 kDa	5	1	2	2
546	Ubiquitin-like modifier-activating enzyme 1 OS=Homo sapiens GN=UBA1 PE=1 SV=3	UBA1_HUMAN	118 kDa	0	0	2	0
547	Elongation factor 1-gamma OS=Homo sapiens GN=EEF1G PE=1 SV=3	EF1G_HUMAN	50 kDa	8	6	2	1
548	U2 snRNP-associated SURP motif-containing protein OS=Homo sapiens GN=U2SURP PE=1 SV=2	SR140_HUMAN	118 kDa	7	10	2	0
549	Serine/arginine-rich splicing factor 9 OS=Homo sapiens GN=SRSF9 PE=1 SV=1	SRSF9_HUMAN	26 kDa	5	6	2	2
550	39S ribosomal protein L1, mitochondrial OS=Homo sapiens GN=MRPL1 PE=1 SV=2	RM01_HUMAN	37 kDa	1	0	2	0
551	Developmentally-regulated GTP-binding protein 1 OS=Homo sapiens GN=DRG1 PE=1 SV=1	DRG1_HUMAN	41 kDa	3	3	2	1
552	Dynactin subunit 2 OS=Homo sapiens GN=DCTN2 PE=1 SV=4	DCTN2_HUMAN	44 kDa	2	3	2	0
553	Eukaryotic translation initiation factor 2 subunit 3 OS=Homo sapiens GN=EIF2S3 PE=1 SV=3	IF2G_HUMAN	51 kDa	1	0	2	2
554	GTP-binding protein 10 OS=Homo sapiens GN=GTPBP10 PE=1 SV=1	GTPBA_HUMAN	43 kDa	1	1	2	0
555	Cluster of Hemoglobin subunit beta OS=Homo sapiens GN=HBB PE=1 SV=2 (HBB_HUMAN)	HBB_HUMAN [4]	16 kDa	0	1	2	1
556	Poly [ADP-ribose] polymerase 1 OS=Homo sapiens GN=PARP1 PE=1 SV=4	PARP1_HUMAN	113 kDa	7	6	2	1
557	Replication protein A 70 kDa DNA-binding subunit OS=Homo sapiens GN=RPA1 PE=1 SV=2	RFA1_HUMAN	68 kDa	0	0	2	0
558	TAR DNA-binding protein 43 OS=Homo sapiens GN=TARDBP PE=1 SV=1	TADBP_HUMAN	45 kDa	4	4	2	0
559	Phosphoribosyl pyrophosphate synthase-associated protein 1 OS=Homo sapiens GN=PRPSAP1 PE=1 SV=2	KPRA_HUMAN	39 kDa	3	1	2	2
560	Histone H1x OS=Homo sapiens GN=H1FX PE=1 SV=1	H1X_HUMAN	22 kDa	5	5	2	2
561	Histone H1.0 OS=Homo sapiens GN=H1F0 PE=1 SV=3	H10_HUMAN	21 kDa	2	2	2	2
562	Single-stranded DNA-binding protein, mitochondrial OS=Homo sapiens GN=SSBP1 PE=1 SV=1	SSBP_HUMAN	17 kDa	2	3	2	2
563	Arginine--tRNA ligase, cytoplasmic OS=Homo sapiens GN=RARS PE=1 SV=2	SYRC_HUMAN	75 kDa	4	3	2	1
564	1,4-alpha-glucan-branching enzyme OS=Homo sapiens GN=GBE1 PE=1 SV=3	GLGB_HUMAN	80 kDa	0	0	2	1
565	Elongation factor 1-delta OS=Homo sapiens GN=EEF1D PE=1 SV=5	EF1D_HUMAN	31 kDa	3	4	2	2
566	Importin subunit beta-1 OS=Homo sapiens GN=KPNB1 PE=1 SV=2	IMB1_HUMAN	97 kDa	2	2	2	1
567	Serpin B12 OS=Homo sapiens GN=SERPINB12 PE=1 SV=1	SPB12_HUMAN	46 kDa	5	4	2	7
568	S-phase kinase-associated protein 1 OS=Homo sapiens GN=SKP1 PE=1 SV=2	SKP1_HUMAN	19 kDa	6	8	2	2
569	Bifunctional glutamate/proline--tRNA ligase OS=Homo sapiens GN=EPRS PE=1 SV=5	SYEP_HUMAN	171 kDa	7	5	2	0
570	ATP synthase subunit gamma, mitochondrial OS=Homo sapiens GN=ATP5C1 PE=1 SV=1	ATPG_HUMAN	33 kDa	4	6	2	1
571	Cluster of Ubiquitin carboxyl-terminal hydrolase 11 OS=Homo sapiens GN=USP11 PE=1 SV=3 (UBP11_HUMAN)	UBP11_HUMAN [3]	110 kDa	3	4	2	0
572	39S ribosomal protein L11, mitochondrial OS=Homo sapiens GN=MRPL11 PE=1 SV=1	RM11_HUMAN	21 kDa	4	4	2	2
573	Glutamine--tRNA ligase OS=Homo sapiens GN=QARS PE=1 SV=1	SYQ_HUMAN	88 kDa	6	2	2	0
574	Filaggrin-2 OS=Homo sapiens GN=FLG2 PE=1 SV=1	FILA2_HUMAN	248 kDa	3	5	2	2
575	Cluster of Histone H3.2 OS=Homo sapiens GN=HIST2H3A PE=1 SV=3 (H32_HUMAN)	H32_HUMAN [4]	15 kDa	4	0	2	0
576	C-1-tetrahydrofolate synthase, cytoplasmic OS=Homo sapiens GN=MTHFD1 PE=1 SV=3	C1TC_HUMAN	102 kDa	2	1	2	1
577	Eukaryotic translation initiation factor 3 subunit I OS=Homo sapiens GN=EIF3I PE=1 SV=1	EIF3I_HUMAN	37 kDa	8	5	2	0
578	39S ribosomal protein L39, mitochondrial OS=Homo sapiens GN=MRPL39 PE=1 SV=3	RM39_HUMAN	39 kDa	2	1	2	2
579	Heterogeneous nuclear ribonucleoprotein U-like protein 2 OS=Homo sapiens GN=HNRNPUL2 PE=1 SV=1	HNRL2_HUMAN	85 kDa	9	2	2	1
580	E3 ubiquitin-protein ligase TRIP12 OS=Homo sapiens GN=TRIP12 PE=1 SV=1	TRIPC_HUMAN	220 kDa	0	2	2	1
581	Cluster of Splicing factor, arginine/serine-rich 15 OS=Homo sapiens GN=SCAF4 PE=1 SV=3 (SFR15_HUMAN)	SFR15_HUMAN [2]	126 kDa	3	3	2	0
582	Trifunctional enzyme subunit alpha, mitochondrial OS=Homo sapiens GN=HADHA PE=1 SV=2	ECHA_HUMAN	83 kDa	6	3	2	1
583	40S ribosomal protein S26 OS=Homo sapiens GN=RPS26 PE=1 SV=3	RS26_HUMAN	13 kDa	4	3	2	3
584	Core histone macro-H2A.1 OS=Homo sapiens GN=H2AFY PE=1 SV=4	H2AY_HUMAN	40 kDa	2	1	2	1
585	Cyclin-F OS=Homo sapiens GN=CCNF PE=1 SV=2	CCNF_HUMAN	88 kDa	26	25	2	4
586	40S ribosomal protein S20 OS=Homo sapiens GN=RPS20 PE=1 SV=1	RS20_HUMAN	13 kDa	4	4	2	3
587	A-kinase anchor protein 8 OS=Homo sapiens GN=AKAP8 PE=1 SV=1	AKAP8_HUMAN	76 kDa	6	4	2	2
588	ATP synthase subunit beta, mitochondrial OS=Homo sapiens GN=ATP5B PE=1 SV=3	ATPB_HUMAN	57 kDa	14	12	2	4
589	Eukaryotic translation initiation factor 3 subunit M OS=Homo sapiens GN=EIF3M PE=1 SV=1	EIF3M_HUMAN	43 kDa	5	4	2	3
590	Nuclear RNA export factor 1 OS=Homo sapiens GN=NXF1 PE=1 SV=1	NXF1_HUMAN	70 kDa	3	1	2	0
591	Prohibitin-2 OS=Homo sapiens GN=PHB2 PE=1 SV=2	PHB2_HUMAN	33 kDa	7	7	2	0
592	Zinc finger CCHC domain-containing protein 3 OS=Homo sapiens GN=ZCCHC3 PE=1 SV=1	ZCHC3_HUMAN	44 kDa	4	4	2	2
593	Signal recognition particle subunit SRP72 OS=Homo sapiens GN=SRP72 PE=1 SV=3	SRP72_HUMAN	75 kDa	0	0	2	0
594	Protein transport protein Sec16A OS=Homo sapiens GN=SEC16A PE=1 SV=3	SC16A_HUMAN	234 kDa	2	5	2	2
595	ATP-binding cassette sub-family F member 1 OS=Homo sapiens GN=ABCF1 PE=1 SV=2	ABCF1_HUMAN	96 kDa	2	2	2	0
596	60S ribosomal protein L32 OS=Homo sapiens GN=RPL32 PE=1 SV=2	RL32_HUMAN	16 kDa	4	4	2	2
597	Signal recognition particle subunit SRP68 OS=Homo sapiens GN=SRP68 PE=1 SV=2	SRP68_HUMAN	71 kDa	1	0	2	4
598	Squamous cell carcinoma antigen recognized by T-cells 3 OS=Homo sapiens GN=SART3 PE=1 SV=1	SART3_HUMAN	110 kDa	3	8	2	1
599	SWI/SNF-related matrix-associated actin-dependent regulator of chromatin subfamily E member 1 OS=Homo sapiens GN=SMARCE1 PE=1 SV=2	SMCE1_HUMAN	47 kDa	5	4	2	4
600	Replication factor C subunit 5 OS=Homo sapiens GN=RFC5 PE=1 SV=1	RFC5_HUMAN	38 kDa	2	0	2	1
601	Keratin, type II cytoskeletal 72 OS=Homo sapiens GN=KRT72 PE=1 SV=2	K2C72_HUMAN	56 kDa	2	3	3	4
602	AT-rich interactive domain-containing protein 1B OS=Homo sapiens GN=ARID1B PE=1 SV=2	ARI1B_HUMAN	236 kDa	0	4	3	2
603	Nucleosome assembly protein 1-like 1 OS=Homo sapiens GN=NAP1L1 PE=1 SV=1	NP1L1_HUMAN	45 kDa	5	8	3	3
604	Protein transport protein Sec24A OS=Homo sapiens GN=SEC24A PE=1 SV=2	SC24A_HUMAN	120 kDa	0	0	3	1
605	Arginase-1 OS=Homo sapiens GN=ARG1 PE=1 SV=2	ARGI1_HUMAN	35 kDa	4	6	3	4
606	Small nuclear ribonucleoprotein F OS=Homo sapiens GN=SNRPF PE=1 SV=1	RUXF_HUMAN	10 kDa	3	3	3	0
607	rRNA methyltransferase 1, mitochondrial OS=Homo sapiens GN=MRM1 PE=1 SV=1	MRM1_HUMAN	39 kDa	3	2	3	0
608	Aspartyl/asparaginyl beta-hydroxylase OS=Homo sapiens GN=ASPH PE=1 SV=3	ASPH_HUMAN	86 kDa	4	3	3	1
609	Serine/arginine-rich splicing factor 3 OS=Homo sapiens GN=SRSF3 PE=1 SV=1	SRSF3_HUMAN	19 kDa	3	3	3	0
610	Cystatin-A OS=Homo sapiens GN=CSTA PE=1 SV=1	CYTA_HUMAN	11 kDa	3	4	3	3
611	39S ribosomal protein L12, mitochondrial OS=Homo sapiens GN=MRPL12 PE=1 SV=2	RM12_HUMAN	21 kDa	2	6	3	2
612	60S acidic ribosomal protein P1 OS=Homo sapiens GN=RPLP1 PE=1 SV=1	RLA1_HUMAN	12 kDa	3	3	3	2
613	Sorting nexin-9 OS=Homo sapiens GN=SNX9 PE=1 SV=1	SNX9_HUMAN	67 kDa	1	0	3	1
614	60S ribosomal protein L37a OS=Homo sapiens GN=RPL37A PE=1 SV=2	RL37A_HUMAN	10 kDa	2	3	3	2
615	L-lactate dehydrogenase B chain OS=Homo sapiens GN=LDHB PE=1 SV=2	LDHB_HUMAN	37 kDa	1	1	3	0
616	Protein CYR61 OS=Homo sapiens GN=CYR61 PE=1 SV=1	CYR61_HUMAN	42 kDa	5	1	3	1
617	Cold-inducible RNA-binding protein OS=Homo sapiens GN=CIRBP PE=1 SV=1	CIRBP_HUMAN	19 kDa	5	5	3	1
618	Bystin OS=Homo sapiens GN=BYSL PE=1 SV=3	BYST_HUMAN	50 kDa	4	4	3	1
619	Valine--tRNA ligase OS=Homo sapiens GN=VARS PE=1 SV=4	SYVC_HUMAN	140 kDa	0	4	3	0
620	Lupus La protein OS=Homo sapiens GN=SSB PE=1 SV=2	LA_HUMAN	47 kDa	7	5	3	4
621	Melanoma-associated antigen B2 OS=Homo sapiens GN=MAGEB2 PE=1 SV=3	MAGB2_HUMAN	35 kDa	4	4	3	3
622	Vigilin OS=Homo sapiens GN=HDLBP PE=1 SV=2	VIGLN_HUMAN	141 kDa	8	12	3	0
623	28S ribosomal protein S27, mitochondrial OS=Homo sapiens GN=MRPS27 PE=1 SV=3	RT27_HUMAN	48 kDa	3	3	3	2
624	60S ribosomal protein L21 OS=Homo sapiens GN=RPL21 PE=1 SV=2	RL21_HUMAN	19 kDa	2	4	3	3
625	60S ribosomal protein L36 OS=Homo sapiens GN=RPL36 PE=1 SV=3	RL36_HUMAN	12 kDa	3	4	3	2
626	Serrate RNA effector molecule homolog OS=Homo sapiens GN=SRRT PE=1 SV=1	SRRT_HUMAN	101 kDa	5	5	3	1
627	RNA-binding protein Raly OS=Homo sapiens GN=RALY PE=1 SV=1	RALY_HUMAN	32 kDa	7	7	3	3
628	DnaJ homolog subfamily B member 11 OS=Homo sapiens GN=DNAJB11 PE=1 SV=1	DJB11_HUMAN	41 kDa	4	3	3	1
629	Cluster of Pyruvate kinase PKM OS=Homo sapiens GN=PKM PE=1 SV=4 (KPYM_HUMAN)	KPYM_HUMAN [2]	58 kDa	5	11	3	9
630	Probable dimethyladenosine transferase OS=Homo sapiens GN=DIMT1 PE=1 SV=1	DIM1_HUMAN	35 kDa	2	3	3	0
631	Protein CMSS1 OS=Homo sapiens GN=CMSS1 PE=1 SV=2	CMS1_HUMAN	32 kDa	5	2	3	0
632	Staphylococcal nuclease domain-containing protein 1 OS=Homo sapiens GN=SND1 PE=1 SV=1	SND1_HUMAN	102 kDa	0	0	3	0
633	Uncharacterized protein C7orf50 OS=Homo sapiens GN=C7orf50 PE=1 SV=1	CG050_HUMAN	22 kDa	5	5	3	3
634	Zinc finger RNA-binding protein OS=Homo sapiens GN=ZFR PE=1 SV=2	ZFR_HUMAN	117 kDa	9	12	3	3
635	116 kDa U5 small nuclear ribonucleoprotein component OS=Homo sapiens GN=EFTUD2 PE=1 SV=1	U5S1_HUMAN	109 kDa	5	1	3	1
636	DNA-directed RNA polymerase, mitochondrial OS=Homo sapiens GN=POLRMT PE=1 SV=2	RPOM_HUMAN	139 kDa	2	4	3	0
637	Cluster of DNA dC->dU-editing enzyme APOBEC-3B OS=Homo sapiens GN=APOBEC3B PE=1 SV=1 (ABC3B_HUMAN)	ABC3B_HUMAN [2]	46 kDa	3	1	3	3
638	Pyridoxal kinase OS=Homo sapiens GN=PDXK PE=1 SV=1	PDXK_HUMAN	35 kDa	4	3	3	2
639	60S ribosomal protein L24 OS=Homo sapiens GN=RPL24 PE=1 SV=1	RL24_HUMAN	18 kDa	5	5	3	4
640	Cluster of DNA topoisomerase 1 OS=Homo sapiens GN=TOP1 PE=1 SV=2 (TOP1_HUMAN)	TOP1_HUMAN [2]	91 kDa	5	2	3	2
641	60S ribosomal protein L27a OS=Homo sapiens GN=RPL27A PE=1 SV=2	RL27A_HUMAN	17 kDa	3	3	3	4
642	Annexin A1 OS=Homo sapiens GN=ANXA1 PE=1 SV=2	ANXA1_HUMAN	39 kDa	4	4	3	8
643	Ataxin-2 OS=Homo sapiens GN=ATXN2 PE=1 SV=2	ATX2_HUMAN	140 kDa	5	8	3	2
644	E3 ubiquitin/ISG15 ligase TRIM25 OS=Homo sapiens GN=TRIM25 PE=1 SV=2	TRI25_HUMAN	71 kDa	1	3	3	3
645	Glutamate-rich WD repeat-containing protein 1 OS=Homo sapiens GN=GRWD1 PE=1 SV=1	GRWD1_HUMAN	49 kDa	6	5	3	4
646	Laminin subunit beta-3 OS=Homo sapiens GN=LAMB3 PE=1 SV=1	LAMB3_HUMAN	130 kDa	5	7	3	0
647	Nitric oxide-associated protein 1 OS=Homo sapiens GN=NOA1 PE=1 SV=2	NOA1_HUMAN	78 kDa	0	0	3	1
648	RRP12-like protein OS=Homo sapiens GN=RRP12 PE=1 SV=2	RRP12_HUMAN	144 kDa	3	2	3	1
649	U2 small nuclear ribonucleoprotein A' OS=Homo sapiens GN=SNRPA1 PE=1 SV=2	RU2A_HUMAN	28 kDa	9	7	3	4
650	Kinectin OS=Homo sapiens GN=KTN1 PE=1 SV=1	KTN1_HUMAN	156 kDa	4	8	3	0
651	60S ribosomal protein L19 OS=Homo sapiens GN=RPL19 PE=1 SV=1	RL19_HUMAN	23 kDa	4	4	3	2
652	Dehydrogenase/reductase SDR family member 2, mitochondrial OS=Homo sapiens GN=DHRS2 PE=1 SV=4	DHRS2_HUMAN	30 kDa	4	4	3	3
653	Cluster of Small nuclear ribonucleoprotein-associated proteins B and B' OS=Homo sapiens GN=SNRPB PE=1 SV=2 (RSMB_HUMAN)	RSMB_HUMAN [2]	25 kDa	7	5	3	3
654	Polyadenylate-binding protein 2 OS=Homo sapiens GN=PABPN1 PE=1 SV=3	PABP2_HUMAN	33 kDa	4	4	3	3
655	40S ribosomal protein S28 OS=Homo sapiens GN=RPS28 PE=1 SV=1	RS28_HUMAN	8 kDa	2	2	3	3
656	Interferon-induced, double-stranded RNA-activated protein kinase OS=Homo sapiens GN=EIF2AK2 PE=1 SV=2	E2AK2_HUMAN	62 kDa	4	2	3	3
657	Cluster of 60S ribosomal protein L13a OS=Homo sapiens GN=RPL13A PE=1 SV=2 (RL13A_HUMAN)	RL13A_HUMAN [2]	24 kDa	5	7	3	3
658	Transcription intermediary factor 1-beta OS=Homo sapiens GN=TRIM28 PE=1 SV=5	TIF1B_HUMAN	89 kDa	8	5	3	2
659	60S ribosomal protein L38 OS=Homo sapiens GN=RPL38 PE=1 SV=2	RL38_HUMAN	8 kDa	4	4	3	1
660	Exosome component 10 OS=Homo sapiens GN=EXOSC10 PE=1 SV=2	EXOSX_HUMAN	101 kDa	4	1	3	2
661	60S ribosomal protein L15 OS=Homo sapiens GN=RPL15 PE=1 SV=2	RL15_HUMAN	24 kDa	5	5	3	3
662	60S ribosomal protein L35 OS=Homo sapiens GN=RPL35 PE=1 SV=2	RL35_HUMAN	15 kDa	3	4	3	2
663	Cleavage and polyadenylation specificity factor subunit 6 OS=Homo sapiens GN=CPSF6 PE=1 SV=2	CPSF6_HUMAN	59 kDa	3	2	3	3
664	DAZ-associated protein 1 OS=Homo sapiens GN=DAZAP1 PE=1 SV=1	DAZP1_HUMAN	43 kDa	5	3	3	3
665	60S ribosomal protein L34 OS=Homo sapiens GN=RPL34 PE=1 SV=3	RL34_HUMAN	13 kDa	3	3	3	3
666	40S ribosomal protein S24 OS=Homo sapiens GN=RPS24 PE=1 SV=1	RS24_HUMAN	15 kDa	4	4	3	3
667	60S ribosomal protein L13 OS=Homo sapiens GN=RPL13 PE=1 SV=4	RL13_HUMAN	24 kDa	5	4	3	4
668	Putative pre-mRNA-splicing factor ATP-dependent RNA helicase DHX15 OS=Homo sapiens GN=DHX15 PE=1 SV=2	DHX15_HUMAN	91 kDa	5	4	3	6
669	RNA-binding protein Musashi homolog 2 OS=Homo sapiens GN=MSI2 PE=1 SV=1	MSI2H_HUMAN	35 kDa	4	4	3	2
670	Cluster of Small nuclear ribonucleoprotein G OS=Homo sapiens GN=SNRPG PE=1 SV=1 (RUXG_HUMAN)	RUXG_HUMAN [2]	8 kDa	2	3	3	3
671	28S ribosomal protein S22, mitochondrial OS=Homo sapiens GN=MRPS22 PE=1 SV=1	RT22_HUMAN	41 kDa	11	6	3	4
672	28S ribosomal protein S28, mitochondrial OS=Homo sapiens GN=MRPS28 PE=1 SV=1	RT28_HUMAN	21 kDa	3	4	3	4
673	Zinc finger CCCH-type antiviral protein 1 OS=Homo sapiens GN=ZC3HAV1 PE=1 SV=3	ZCCHV_HUMAN	101 kDa	5	1	3	4
674	Cluster of 40S ribosomal protein S10 OS=Homo sapiens GN=RPS10 PE=1 SV=1 (RS10_HUMAN)	RS10_HUMAN [2]	19 kDa	6	5	3	4
675	Peptidyl-prolyl cis-trans isomerase A OS=Homo sapiens GN=PPIA PE=1 SV=2	PPIA_HUMAN	18 kDa	4	8	3	3
676	Cluster of Polypyrimidine tract-binding protein 1 OS=Homo sapiens GN=PTBP1 PE=1 SV=1 (PTBP1_HUMAN)	PTBP1_HUMAN [2]	57 kDa	9	10	3	5
677	CTP synthase 1 OS=Homo sapiens GN=CTPS1 PE=1 SV=2	PYRG1_HUMAN	67 kDa	6	3	3	2
678	Serum albumin OS=Homo sapiens GN=ALB PE=1 SV=2	ALBU_HUMAN	69 kDa	13	17	3	6
679	Keratin, type II cytoskeletal 80 OS=Homo sapiens GN=KRT80 PE=1 SV=2	K2C80_HUMAN	51 kDa	2	7	4	2
680	Cluster of RNA-binding motif protein, X chromosome OS=Homo sapiens GN=RBMX PE=1 SV=3 (RBMX_HUMAN)	RBMX_HUMAN [2]	42 kDa	9	9	4	3
681	Nucleolysin TIA-1 isoform p40 OS=Homo sapiens GN=TIA1 PE=1 SV=3	TIA1_HUMAN	43 kDa	6	6	4	5
682	Serine/arginine-rich splicing factor 7 OS=Homo sapiens GN=SRSF7 PE=1 SV=1	SRSF7_HUMAN	27 kDa	5	3	4	3
683	Cluster of Peroxiredoxin-1 OS=Homo sapiens GN=PRDX1 PE=1 SV=1 (PRDX1_HUMAN)	PRDX1_HUMAN [2]	22 kDa	6	6	4	5
684	Annexin A7 OS=Homo sapiens GN=ANXA7 PE=1 SV=3	ANXA7_HUMAN	53 kDa	6	7	4	4
685	2,4-dienoyl-CoA reductase, mitochondrial OS=Homo sapiens GN=DECR1 PE=1 SV=1	DECR_HUMAN	36 kDa	4	4	4	0
686	28S ribosomal protein S23, mitochondrial OS=Homo sapiens GN=MRPS23 PE=1 SV=2	RT23_HUMAN	22 kDa	4	5	4	3
687	DNA-directed RNA polymerases I and III subunit RPAC1 OS=Homo sapiens GN=POLR1C PE=1 SV=1	RPAC1_HUMAN	39 kDa	5	3	4	0
688	Exosome complex component RRP4 OS=Homo sapiens GN=EXOSC2 PE=1 SV=2	EXOS2_HUMAN	33 kDa	5	4	4	0
689	Isoleucine--tRNA ligase, cytoplasmic OS=Homo sapiens GN=IARS PE=1 SV=2	SYIC_HUMAN	145 kDa	4	11	4	1
690	Probable ATP-dependent RNA helicase DDX47 OS=Homo sapiens GN=DDX47 PE=1 SV=1	DDX47_HUMAN	51 kDa	5	5	4	4
691	Probable RNA-binding protein 19 OS=Homo sapiens GN=RBM19 PE=1 SV=3	RBM19_HUMAN	107 kDa	6	8	4	1
692	Prohibitin OS=Homo sapiens GN=PHB PE=1 SV=1	PHB_HUMAN	30 kDa	4	5	4	2
693	Cluster of RNA-binding protein 4B OS=Homo sapiens GN=RBM4B PE=1 SV=1 (RBM4B_HUMAN)	RBM4B_HUMAN [2]	40 kDa	3	1	4	1
694	Replication factor C subunit 4 OS=Homo sapiens GN=RFC4 PE=1 SV=2	RFC4_HUMAN	40 kDa	4	1	4	2
695	RNA-binding protein 10 OS=Homo sapiens GN=RBM10 PE=1 SV=3	RBM10_HUMAN	104 kDa	3	2	4	1
696	Pre-rRNA-processing protein TSR1 homolog OS=Homo sapiens GN=TSR1 PE=1 SV=1	TSR1_HUMAN	92 kDa	4	4	4	4
697	Polymerase I and transcript release factor OS=Homo sapiens GN=PTRF PE=1 SV=1	PTRF_HUMAN	43 kDa	6	5	4	3
698	tRNA (cytosine(34)-C(5))-methyltransferase OS=Homo sapiens GN=NSUN2 PE=1 SV=2	NSUN2_HUMAN	86 kDa	1	2	4	3
699	Ubiquitin carboxyl-terminal hydrolase 10 OS=Homo sapiens GN=USP10 PE=1 SV=2	UBP10_HUMAN	87 kDa	4	2	4	5
700	60S ribosomal protein L28 OS=Homo sapiens GN=RPL28 PE=1 SV=3	RL28_HUMAN	16 kDa	4	4	4	3
701	Serine/arginine-rich splicing factor 5 OS=Homo sapiens GN=SRSF5 PE=1 SV=1	SRSF5_HUMAN	31 kDa	5	3	4	3
702	60S ribosomal protein L17 OS=Homo sapiens GN=RPL17 PE=1 SV=3	RL17_HUMAN	21 kDa	6	6	4	3
703	Small nuclear ribonucleoprotein Sm D3 OS=Homo sapiens GN=SNRPD3 PE=1 SV=1	SMD3_HUMAN	14 kDa	4	4	4	3
704	Matrix metalloproteinase-9 OS=Homo sapiens GN=MMP9 PE=1 SV=3	MMP9_HUMAN	78 kDa	4	0	4	4
705	60S ribosomal protein L18a OS=Homo sapiens GN=RPL18A PE=1 SV=2	RL18A_HUMAN	21 kDa	2	3	4	1
706	Fragile X mental retardation syndrome-related protein 1 OS=Homo sapiens GN=FXR1 PE=1 SV=3	FXR1_HUMAN	70 kDa	4	3	4	2
707	E3 ubiquitin-protein ligase TRIM21 OS=Homo sapiens GN=TRIM21 PE=1 SV=1	RO52_HUMAN	54 kDa	9	4	4	4
708	60S ribosomal protein L11 OS=Homo sapiens GN=RPL11 PE=1 SV=2	RL11_HUMAN	20 kDa	5	5	4	2
709	Dermcidin OS=Homo sapiens GN=DCD PE=1 SV=2	DCD_HUMAN	11 kDa	3	3	4	3
710	Serine-threonine kinase receptor-associated protein OS=Homo sapiens GN=STRAP PE=1 SV=1	STRAP_HUMAN	38 kDa	9	5	4	3
711	Cluster of Spectrin beta chain, non-erythrocytic 1 OS=Homo sapiens GN=SPTBN1 PE=1 SV=2 (SPTB2_HUMAN)	SPTB2_HUMAN [2]	275 kDa	6	22	4	5
712	THO complex subunit 4 OS=Homo sapiens GN=ALYREF PE=1 SV=3	THOC4_HUMAN	27 kDa	8	8	4	3
713	40S ribosomal protein S25 OS=Homo sapiens GN=RPS25 PE=1 SV=1	RS25_HUMAN	14 kDa	4	4	4	3
714	60S ribosomal protein L27 OS=Homo sapiens GN=RPL27 PE=1 SV=2	RL27_HUMAN	16 kDa	3	4	4	4
715	72 kDa type IV collagenase OS=Homo sapiens GN=MMP2 PE=1 SV=2	MMP2_HUMAN	74 kDa	5	3	4	5
716	Small nuclear ribonucleoprotein Sm D2 OS=Homo sapiens GN=SNRPD2 PE=1 SV=1	SMD2_HUMAN	14 kDa	6	7	4	5
717	YTH domain-containing family protein 3 OS=Homo sapiens GN=YTHDF3 PE=1 SV=1	YTHD3_HUMAN	64 kDa	6	6	4	4
718	40S ribosomal protein S11 OS=Homo sapiens GN=RPS11 PE=1 SV=3	RS11_HUMAN	18 kDa	6	6	4	5
719	40S ribosomal protein S12 OS=Homo sapiens GN=RPS12 PE=1 SV=3	RS12_HUMAN	15 kDa	7	8	4	6
720	40S ribosomal protein S15 OS=Homo sapiens GN=RPS15 PE=1 SV=2	RS15_HUMAN	17 kDa	5	4	4	4
721	ATP-dependent RNA helicase DDX18 OS=Homo sapiens GN=DDX18 PE=1 SV=2	DDX18_HUMAN	75 kDa	4	4	4	3
722	Small nuclear ribonucleoprotein E OS=Homo sapiens GN=SNRPE PE=1 SV=1	RUXE_HUMAN	11 kDa	4	4	4	4
723	Transcriptional activator protein Pur-alpha OS=Homo sapiens GN=PURA PE=1 SV=2	PURA_HUMAN	35 kDa	7	5	4	4
724	Heat shock protein beta-1 OS=Homo sapiens GN=HSPB1 PE=1 SV=2	HSPB1_HUMAN	23 kDa	9	11	4	4
725	ATP synthase subunit alpha, mitochondrial OS=Homo sapiens GN=ATP5A1 PE=1 SV=1	ATPA_HUMAN	60 kDa	9	13	4	3
726	Keratin, type II cytoskeletal 78 OS=Homo sapiens GN=KRT78 PE=2 SV=2	K2C78_HUMAN	57 kDa	6	8	4	7
727	Double-stranded RNA-binding protein Staufen homolog 1 OS=Homo sapiens GN=STAU1 PE=1 SV=2	STAU1_HUMAN	63 kDa	9	12	4	9
728	FACT complex subunit SSRP1 OS=Homo sapiens GN=SSRP1 PE=1 SV=1	SSRP1_HUMAN	81 kDa	6	3	4	5
729	U1 small nuclear ribonucleoprotein 70 kDa OS=Homo sapiens GN=SNRNP70 PE=1 SV=2	RU17_HUMAN	52 kDa	17	12	4	7
730	Cluster of Keratin, type II cytoskeletal 73 OS=Homo sapiens GN=KRT73 PE=1 SV=1 (K2C73_HUMAN)	K2C73_HUMAN [2]	59 kDa	5	5	5	5
731	Keratin, type II cytoskeletal 4 OS=Homo sapiens GN=KRT4 PE=1 SV=4	K2C4_HUMAN	57 kDa	9	6	5	11
732	Eukaryotic translation initiation factor 3 subunit H OS=Homo sapiens GN=EIF3H PE=1 SV=1	EIF3H_HUMAN	40 kDa	4	4	5	4
733	Protein transport protein Sec31A OS=Homo sapiens GN=SEC31A PE=1 SV=3	SC31A_HUMAN	133 kDa	4	6	5	2
734	Splicing factor 3B subunit 2 OS=Homo sapiens GN=SF3B2 PE=1 SV=2	SF3B2_HUMAN	100 kDa	9	9	5	2
735	Splicing factor 3B subunit 3 OS=Homo sapiens GN=SF3B3 PE=1 SV=4	SF3B3_HUMAN	136 kDa	4	6	5	9
736	Ubiquitin-associated protein 2-like OS=Homo sapiens GN=UBAP2L PE=1 SV=2	UBP2L_HUMAN	115 kDa	3	4	5	5
737	UDP-glucose:glycoprotein glucosyltransferase 1 OS=Homo sapiens GN=UGGT1 PE=1 SV=3	UGGG1_HUMAN	177 kDa	11	3	5	0
738	RNA-binding protein 6 OS=Homo sapiens GN=RBM6 PE=1 SV=5	RBM6_HUMAN	129 kDa	10	10	5	0
739	Microtubule-associated protein 4 OS=Homo sapiens GN=MAP4 PE=1 SV=3	MAP4_HUMAN	121 kDa	5	7	5	0
740	Protein PRRC2A OS=Homo sapiens GN=PRRC2A PE=1 SV=3	PRC2A_HUMAN	229 kDa	5	5	5	2
741	Actin-like protein 6A OS=Homo sapiens GN=ACTL6A PE=1 SV=1	ACL6A_HUMAN	47 kDa	6	6	5	3
742	Protein LYRIC OS=Homo sapiens GN=MTDH PE=1 SV=2	LYRIC_HUMAN	64 kDa	5	6	5	2
743	pre-rRNA processing protein FTSJ3 OS=Homo sapiens GN=FTSJ3 PE=1 SV=2	SPB1_HUMAN	97 kDa	4	9	5	4
744	Eukaryotic translation initiation factor 3 subunit F OS=Homo sapiens GN=EIF3F PE=1 SV=1	EIF3F_HUMAN	38 kDa	9	9	5	3
745	AP-2 complex subunit alpha-1 OS=Homo sapiens GN=AP2A1 PE=1 SV=3	AP2A1_HUMAN	108 kDa	4	1	5	2
746	60S ribosomal protein L14 OS=Homo sapiens GN=RPL14 PE=1 SV=4	RL14_HUMAN	23 kDa	4	4	5	4
747	Cluster of 60S ribosomal protein L10 OS=Homo sapiens GN=RPL10 PE=1 SV=4 (RL10_HUMAN)	RL10_HUMAN [2]	25 kDa	7	7	5	4
748	Splicing factor, proline- and glutamine-rich OS=Homo sapiens GN=SFPQ PE=1 SV=2	SFPQ_HUMAN	76 kDa	7	2	5	7
749	14-3-3 protein zeta/delta OS=Homo sapiens GN=YWHAZ PE=1 SV=1	1433Z_HUMAN	28 kDa	12	11	5	5
750	Cluster of 14-3-3 protein beta/alpha OS=Homo sapiens GN=YWHAB PE=1 SV=3 (1433B_HUMAN)	1433B_HUMAN [3]	28 kDa	16	19	5	5
751	Putative RNA-binding protein 3 OS=Homo sapiens GN=RBM3 PE=1 SV=1	RBM3_HUMAN	17 kDa	2	2	5	4
752	40S ribosomal protein S21 OS=Homo sapiens GN=RPS21 PE=1 SV=1	RS21_HUMAN	9 kDa	5	4	5	4
753	Small nuclear ribonucleoprotein Sm D1 OS=Homo sapiens GN=SNRPD1 PE=1 SV=1	SMD1_HUMAN	13 kDa	5	5	5	5
754	60S ribosomal protein L22 OS=Homo sapiens GN=RPL22 PE=1 SV=2	RL22_HUMAN	15 kDa	4	4	5	4
755	60S ribosomal protein L31 OS=Homo sapiens GN=RPL31 PE=1 SV=1	RL31_HUMAN	14 kDa	3	4	5	5
756	Double-stranded RNA-specific adenosine deaminase OS=Homo sapiens GN=ADAR PE=1 SV=4	DSRAD_HUMAN	136 kDa	5	3	5	4
757	60S ribosomal protein L9 OS=Homo sapiens GN=RPL9 PE=1 SV=1	RL9_HUMAN	22 kDa	9	7	5	4
758	Nuclear cap-binding protein subunit 1 OS=Homo sapiens GN=NCBP1 PE=1 SV=1	NCBP1_HUMAN	92 kDa	6	4	5	5
759	RNA-binding protein 39 OS=Homo sapiens GN=RBM39 PE=1 SV=2	RBM39_HUMAN	59 kDa	6	5	5	5
760	DNA-directed RNA polymerase II subunit RPB1 OS=Homo sapiens GN=POLR2A PE=1 SV=2	RPB1_HUMAN	217 kDa	3	10	5	2
761	Cluster of Heterogeneous nuclear ribonucleoproteins C1/C2 OS=Homo sapiens GN=HNRNPC PE=1 SV=4 (HNRPC_HUMAN)	HNRPC_HUMAN [2]	34 kDa	12	8	5	5
762	Putative ribosomal RNA methyltransferase NOP2 OS=Homo sapiens GN=NOP2 PE=1 SV=2	NOP2_HUMAN	89 kDa	5	4	5	5
763	RNA-binding protein EWS OS=Homo sapiens GN=EWSR1 PE=1 SV=1	EWS_HUMAN	68 kDa	8	5	5	6
764	Ras GTPase-activating protein-binding protein 1 OS=Homo sapiens GN=G3BP1 PE=1 SV=1	G3BP1_HUMAN	52 kDa	11	15	5	9
765	Keratin, type II cytoskeletal 1b OS=Homo sapiens GN=KRT77 PE=2 SV=3	K2C1B_HUMAN	62 kDa	6	13	6	5
766	Eukaryotic translation initiation factor 3 subunit E OS=Homo sapiens GN=EIF3E PE=1 SV=1	EIF3E_HUMAN	52 kDa	9	9	6	2
767	N-acetyltransferase 10 OS=Homo sapiens GN=NAT10 PE=1 SV=2	NAT10_HUMAN	116 kDa	1	2	6	9
768	Protein transport protein Sec23B OS=Homo sapiens GN=SEC23B PE=1 SV=2	SC23B_HUMAN	86 kDa	0	1	6	2
769	Putative helicase MOV-10 OS=Homo sapiens GN=MOV10 PE=1 SV=2	MOV10_HUMAN	114 kDa	5	2	6	15
770	Cluster of DNA topoisomerase 2-alpha OS=Homo sapiens GN=TOP2A PE=1 SV=3 (TOP2A_HUMAN)	TOP2A_HUMAN [2]	174 kDa	2	0	6	3
771	Superkiller viralicidic activity 2-like 2 OS=Homo sapiens GN=SKIV2L2 PE=1 SV=3	SK2L2_HUMAN	118 kDa	5	8	6	1
772	Probable ATP-dependent RNA helicase DDX6 OS=Homo sapiens GN=DDX6 PE=1 SV=2	DDX6_HUMAN	54 kDa	6	6	6	5
773	G-rich sequence factor 1 OS=Homo sapiens GN=GRSF1 PE=1 SV=3	GRSF1_HUMAN	53 kDa	12	11	6	7
774	60S ribosomal protein L8 OS=Homo sapiens GN=RPL8 PE=1 SV=2	RL8_HUMAN	28 kDa	4	6	6	4
775	Cluster of Protein argonaute-2 OS=Homo sapiens GN=AGO2 PE=1 SV=3 (AGO2_HUMAN)	AGO2_HUMAN [3]	97 kDa	8	6	6	18
776	Cluster of Serine/arginine-rich splicing factor 6 OS=Homo sapiens GN=SRSF6 PE=1 SV=2 (SRSF6_HUMAN)	SRSF6_HUMAN [2]	40 kDa	7	4	6	5
777	28S ribosomal protein S9, mitochondrial OS=Homo sapiens GN=MRPS9 PE=1 SV=2	RT09_HUMAN	46 kDa	7	5	6	2
778	Heterochromatin protein 1-binding protein 3 OS=Homo sapiens GN=HP1BP3 PE=1 SV=1	HP1B3_HUMAN	61 kDa	7	1	6	5
779	40S ribosomal protein S15a OS=Homo sapiens GN=RPS15A PE=1 SV=2	RS15A_HUMAN	15 kDa	5	4	6	4
780	60S ribosomal protein L18 OS=Homo sapiens GN=RPL18 PE=1 SV=2	RL18_HUMAN	22 kDa	5	6	6	4
781	60S ribosomal protein L23 OS=Homo sapiens GN=RPL23 PE=1 SV=1	RL23_HUMAN	15 kDa	7	8	6	7
782	Cluster of 60S ribosomal protein L3 OS=Homo sapiens GN=RPL3 PE=1 SV=2 (RL3_HUMAN)	RL3_HUMAN [2]	46 kDa	5	6	6	6
783	40S ribosomal protein S23 OS=Homo sapiens GN=RPS23 PE=1 SV=3	RS23_HUMAN	16 kDa	4	4	6	4
784	60S ribosomal protein L23a OS=Homo sapiens GN=RPL23A PE=1 SV=1	RL23A_HUMAN	18 kDa	9	9	6	6
785	60S ribosomal protein L30 OS=Homo sapiens GN=RPL30 PE=1 SV=2	RL30_HUMAN	13 kDa	6	6	6	6
786	Nucleolysin TIAR OS=Homo sapiens GN=TIAL1 PE=1 SV=1	TIAR_HUMAN	42 kDa	12	8	6	6
787	Cluster of Poly(rC)-binding protein 1 OS=Homo sapiens GN=PCBP1 PE=1 SV=2 (PCBP1_HUMAN)	PCBP1_HUMAN [3]	37 kDa	12	8	6	4
788	40S ribosomal protein S14 OS=Homo sapiens GN=RPS14 PE=1 SV=3	RS14_HUMAN	16 kDa	7	7	6	6
789	Heterogeneous nuclear ribonucleoprotein A/B OS=Homo sapiens GN=HNRNPAB PE=1 SV=2	ROAA_HUMAN	36 kDa	10	8	6	7
790	Cluster of Histone H2A type 2-A OS=Homo sapiens GN=HIST2H2AA3 PE=1 SV=3 (H2A2A_HUMAN)	H2A2A_HUMAN [5]	14 kDa	5	4	6	4
791	TATA-binding protein-associated factor 2N OS=Homo sapiens GN=TAF15 PE=1 SV=1	RBP56_HUMAN	62 kDa	10	8	6	5
792	Nucleophosmin OS=Homo sapiens GN=NPM1 PE=1 SV=2	NPM_HUMAN	33 kDa	11	11	6	7
793	tRNA-splicing ligase RtcB homolog OS=Homo sapiens GN=RTCB PE=1 SV=1	RTCB_HUMAN	55 kDa	19	18	6	9
794	Cyclin-dependent kinase inhibitor 1B OS=Homo sapiens GN=CDKN1B PE=1 SV=1	CDN1B_HUMAN	22 kDa	4	4	6	5
795	DnaJ homolog subfamily C member 10 OS=Homo sapiens GN=DNAJC10 PE=1 SV=2	DJC10_HUMAN	91 kDa	13	10	6	8
796	Glyceraldehyde-3-phosphate dehydrogenase OS=Homo sapiens GN=GAPDH PE=1 SV=3	G3P_HUMAN	36 kDa	8	9	6	7
797	Junction plakoglobin OS=Homo sapiens GN=JUP PE=1 SV=3	PLAK_HUMAN	82 kDa	7	7	6	10
798	Y-box-binding protein 3 OS=Homo sapiens GN=YBX3 PE=1 SV=4	YBOX3_HUMAN	40 kDa	9	12	7	9
799	CAD protein OS=Homo sapiens GN=CAD PE=1 SV=3	PYR1_HUMAN	243 kDa	12	21	7	22
800	DNA-directed RNA polymerase II subunit RPB2 OS=Homo sapiens GN=POLR2B PE=1 SV=1	RPB2_HUMAN	134 kDa	7	15	7	1
801	Eukaryotic translation initiation factor 3 subunit B OS=Homo sapiens GN=EIF3B PE=1 SV=3	EIF3B_HUMAN	92 kDa	13	9	7	4
802	Cluster of Eukaryotic initiation factor 4A-I OS=Homo sapiens GN=EIF4A1 PE=1 SV=1 (IF4A1_HUMAN)	IF4A1_HUMAN [2]	46 kDa	5	5	7	6
803	Replication factor C subunit 2 OS=Homo sapiens GN=RFC2 PE=1 SV=3	RFC2_HUMAN	39 kDa	5	3	7	7
804	Protein transport protein Sec23A OS=Homo sapiens GN=SEC23A PE=1 SV=2	SC23A_HUMAN	86 kDa	0	2	7	6
805	Cluster of AP-2 complex subunit beta OS=Homo sapiens GN=AP2B1 PE=1 SV=1 (AP2B1_HUMAN)	AP2B1_HUMAN [2]	105 kDa	5	2	7	7
806	DnaJ homolog subfamily C member 9 OS=Homo sapiens GN=DNAJC9 PE=1 SV=1	DNJC9_HUMAN	30 kDa	8	7	7	4
807	Heterogeneous nuclear ribonucleoprotein A0 OS=Homo sapiens GN=HNRNPA0 PE=1 SV=1	ROA0_HUMAN	31 kDa	7	7	7	4
808	60S ribosomal protein L26 OS=Homo sapiens GN=RPL26 PE=1 SV=1	RL26_HUMAN	17 kDa	8	9	7	5
809	Cluster of ADP/ATP translocase 2 OS=Homo sapiens GN=SLC25A5 PE=1 SV=7 (ADT2_HUMAN)	ADT2_HUMAN [4]	33 kDa	15	14	7	9
810	40S ribosomal protein S8 OS=Homo sapiens GN=RPS8 PE=1 SV=2	RS8_HUMAN	24 kDa	6	7	7	6
811	La-related protein 4 OS=Homo sapiens GN=LARP4 PE=1 SV=3	LARP4_HUMAN	81 kDa	12	6	7	7
812	Transcriptional activator protein Pur-beta OS=Homo sapiens GN=PURB PE=1 SV=3	PURB_HUMAN	33 kDa	6	7	7	6
813	40S ribosomal protein S13 OS=Homo sapiens GN=RPS13 PE=1 SV=2	RS13_HUMAN	17 kDa	5	5	7	4
814	60S ribosomal protein L12 OS=Homo sapiens GN=RPL12 PE=1 SV=1	RL12_HUMAN	18 kDa	5	7	7	6
815	UPF0568 protein C14orf166 OS=Homo sapiens GN=C14orf166 PE=1 SV=1	CN166_HUMAN	28 kDa	9	10	7	5
816	Trinucleotide repeat-containing gene 6B protein OS=Homo sapiens GN=TNRC6B PE=1 SV=4	TNR6B_HUMAN	194 kDa	9	9	7	7
817	Cell division cycle 5-like protein OS=Homo sapiens GN=CDC5L PE=1 SV=2	CDC5L_HUMAN	92 kDa	11	3	7	6
818	Cluster of Histone H2B type 1-A OS=Homo sapiens GN=HIST1H2BA PE=1 SV=3 (H2B1A_HUMAN)	H2B1A_HUMAN [8]	14 kDa	5	4	7	2
819	Histone H4 OS=Homo sapiens GN=HIST1H4A PE=1 SV=2	H4_HUMAN	11 kDa	6	6	7	5
820	Cluster of Elongation factor 1-alpha 1 OS=Homo sapiens GN=EEF1A1 PE=1 SV=1 (EF1A1_HUMAN)	EF1A1_HUMAN [3]	50 kDa	7	8	7	9
821	Cluster of Histone H1.1 OS=Homo sapiens GN=HIST1H1A PE=1 SV=3 (H11_HUMAN)	H11_HUMAN [6]	22 kDa	7	5	7	5
822	RNA-binding protein FUS OS=Homo sapiens GN=FUS PE=1 SV=1	FUS_HUMAN	53 kDa	9	9	7	12
823	Desmoglein-1 OS=Homo sapiens GN=DSG1 PE=1 SV=2	DSG1_HUMAN	114 kDa	9	7	7	9
824	Cluster of Alpha-enolase OS=Homo sapiens GN=ENO1 PE=1 SV=2 (ENOA_HUMAN)	ENOA_HUMAN [3]	47 kDa	10	9	7	5
825	Cluster of Keratin, type II cytoskeletal 7 OS=Homo sapiens GN=KRT7 PE=1 SV=5 (K2C7_HUMAN)	K2C7_HUMAN [3]	51 kDa	12	18	8	10
826	Myb-binding protein 1A OS=Homo sapiens GN=MYBBP1A PE=1 SV=2	MBB1A_HUMAN	149 kDa	6	7	8	3
827	Eukaryotic translation initiation factor 3 subunit C OS=Homo sapiens GN=EIF3C PE=1 SV=1	EIF3C_HUMAN (+1)	105 kDa	11	6	8	3
828	60S ribosomal protein L10a OS=Homo sapiens GN=RPL10A PE=1 SV=2	RL10A_HUMAN	25 kDa	10	10	8	4
829	28S ribosomal protein S29, mitochondrial OS=Homo sapiens GN=DAP3 PE=1 SV=1	RT29_HUMAN	46 kDa	8	6	8	4
830	40S ribosomal protein S6 OS=Homo sapiens GN=RPS6 PE=1 SV=1	RS6_HUMAN	29 kDa	9	8	8	5
831	Cluster of Ribosome-binding protein 1 OS=Homo sapiens GN=RRBP1 PE=1 SV=4 (RRBP1_HUMAN)	RRBP1_HUMAN [2]	152 kDa	9	17	8	10
832	60S ribosomal protein L5 OS=Homo sapiens GN=RPL5 PE=1 SV=3	RL5_HUMAN	34 kDa	11	8	8	11
833	40S ribosomal protein S7 OS=Homo sapiens GN=RPS7 PE=1 SV=1	RS7_HUMAN	22 kDa	7	6	8	8
834	40S ribosomal protein S5 OS=Homo sapiens GN=RPS5 PE=1 SV=4	RS5_HUMAN	23 kDa	9	6	8	4
835	40S ribosomal protein S16 OS=Homo sapiens GN=RPS16 PE=1 SV=2	RS16_HUMAN	16 kDa	6	7	8	8
836	40S ribosomal protein S17-like OS=Homo sapiens GN=RPS17L PE=1 SV=1	RS17L_HUMAN (+1)	16 kDa	10	10	8	8
837	Caprin-1 OS=Homo sapiens GN=CAPRIN1 PE=1 SV=2	CAPR1_HUMAN	78 kDa	11	7	8	11
838	40S ribosomal protein S18 OS=Homo sapiens GN=RPS18 PE=1 SV=3	RS18_HUMAN	18 kDa	7	9	8	6
839	Galectin-3-binding protein OS=Homo sapiens GN=LGALS3BP PE=1 SV=1	LG3BP_HUMAN	65 kDa	8	8	8	8
840	mRNA cap guanine-N7 methyltransferase OS=Homo sapiens GN=RNMT PE=1 SV=1	MCES_HUMAN	55 kDa	12	17	8	10
841	Myosin-9 OS=Homo sapiens GN=MYH9 PE=1 SV=4	MYH9_HUMAN	227 kDa	7	20	8	6
842	Cluster of Alpha-actinin-1 OS=Homo sapiens GN=ACTN1 PE=1 SV=2 (ACTN1_HUMAN)	ACTN1_HUMAN [4]	103 kDa	11	10	8	4
843	Putative ATP-dependent RNA helicase DHX57 OS=Homo sapiens GN=DHX57 PE=1 SV=2	DHX57_HUMAN	156 kDa	9	7	9	10
844	ATP-dependent RNA helicase DHX29 OS=Homo sapiens GN=DHX29 PE=1 SV=2	DHX29_HUMAN	155 kDa	8	9	9	11
845	60S ribosomal protein L7 OS=Homo sapiens GN=RPL7 PE=1 SV=1	RL7_HUMAN	29 kDa	11	10	9	5
846	60S ribosomal protein L7a OS=Homo sapiens GN=RPL7A PE=1 SV=2	RL7A_HUMAN	30 kDa	9	8	9	6
847	Protein disulfide-isomerase A6 OS=Homo sapiens GN=PDIA6 PE=1 SV=1	PDIA6_HUMAN	48 kDa	8	8	9	7
848	Cluster of U1 small nuclear ribonucleoprotein A OS=Homo sapiens GN=SNRPA PE=1 SV=3 (SNRPA_HUMAN)	SNRPA_HUMAN [2]	31 kDa	8	7	9	6
849	60S acidic ribosomal protein P2 OS=Homo sapiens GN=RPLP2 PE=1 SV=1	RLA2_HUMAN	12 kDa	8	8	9	8
850	ATP-dependent RNA helicase DHX36 OS=Homo sapiens GN=DHX36 PE=1 SV=2	DHX36_HUMAN	115 kDa	16	9	9	12
851	Heterogeneous nuclear ribonucleoprotein F OS=Homo sapiens GN=HNRNPF PE=1 SV=3	HNRPF_HUMAN	46 kDa	11	10	9	8
852	Heterogeneous nuclear ribonucleoprotein H2 OS=Homo sapiens GN=HNRNPH2 PE=1 SV=1	HNRH2_HUMAN	49 kDa	12	11	9	11
853	Insulin-like growth factor 2 mRNA-binding protein 2 OS=Homo sapiens GN=IGF2BP2 PE=1 SV=2	IF2B2_HUMAN	66 kDa	11	9	9	10
854	Heterogeneous nuclear ribonucleoprotein H3 OS=Homo sapiens GN=HNRNPH3 PE=1 SV=2	HNRH3_HUMAN	37 kDa	11	12	9	8
855	Heterogeneous nuclear ribonucleoprotein K OS=Homo sapiens GN=HNRNPK PE=1 SV=1	HNRPK_HUMAN	51 kDa	17	17	9	12
856	Protein transport protein Sec24C OS=Homo sapiens GN=SEC24C PE=1 SV=3	SC24C_HUMAN	118 kDa	4	6	10	5
857	Splicing factor 3B subunit 1 OS=Homo sapiens GN=SF3B1 PE=1 SV=3	SF3B1_HUMAN	146 kDa	15	22	10	4
858	Replication factor C subunit 1 OS=Homo sapiens GN=RFC1 PE=1 SV=4	RFC1_HUMAN	128 kDa	5	10	10	5
859	Cold shock domain-containing protein E1 OS=Homo sapiens GN=CSDE1 PE=1 SV=2	CSDE1_HUMAN	89 kDa	8	3	10	7
860	40S ribosomal protein S19 OS=Homo sapiens GN=RPS19 PE=1 SV=2	RS19_HUMAN	16 kDa	8	9	10	8
861	ELAV-like protein 1 OS=Homo sapiens GN=ELAVL1 PE=1 SV=2	ELAV1_HUMAN	36 kDa	10	10	10	9
862	5'-3' exoribonuclease 2 OS=Homo sapiens GN=XRN2 PE=1 SV=1	XRN2_HUMAN	109 kDa	12	7	10	11
863	Heterogeneous nuclear ribonucleoprotein D0 OS=Homo sapiens GN=HNRNPD PE=1 SV=1	HNRPD_HUMAN	38 kDa	10	9	10	7
864	Hornerin OS=Homo sapiens GN=HRNR PE=1 SV=2	HORN_HUMAN	282 kDa	5	5	10	7
865	Filamin-C OS=Homo sapiens GN=FLNC PE=1 SV=3	FLNC_HUMAN	291 kDa	23	46	10	11
866	Spectrin alpha chain, non-erythrocytic 1 OS=Homo sapiens GN=SPTAN1 PE=1 SV=3	SPTN1_HUMAN	285 kDa	11	19	10	5
867	Cluster of 60S acidic ribosomal protein P0 OS=Homo sapiens GN=RPLP0 PE=1 SV=1 (RLA0_HUMAN)	RLA0_HUMAN [2]	34 kDa	11	8	10	12
868	Cluster of Heat shock protein HSP 90-beta OS=Homo sapiens GN=HSP90AB1 PE=1 SV=4 (HS90B_HUMAN)	HS90B_HUMAN [7]	83 kDa	23	18	10	10
869	Stress-70 protein, mitochondrial OS=Homo sapiens GN=HSPA9 PE=1 SV=2	GRP75_HUMAN	74 kDa	15	11	10	11
870	Constitutive coactivator of PPAR-gamma-like protein 1 OS=Homo sapiens GN=FAM120A PE=1 SV=2	F120A_HUMAN	122 kDa	9	14	11	2
871	Leucine-rich PPR motif-containing protein, mitochondrial OS=Homo sapiens GN=LRPPRC PE=1 SV=3	LPPRC_HUMAN	158 kDa	9	19	11	0
872	Cluster of 40S ribosomal protein S4, X isoform OS=Homo sapiens GN=RPS4X PE=1 SV=2 (RS4X_HUMAN)	RS4X_HUMAN [3]	30 kDa	13	11	11	10
873	Nuclear mitotic apparatus protein 1 OS=Homo sapiens GN=NUMA1 PE=1 SV=2	NUMA1_HUMAN	238 kDa	12	18	11	6
874	Serine/arginine-rich splicing factor 1 OS=Homo sapiens GN=SRSF1 PE=1 SV=2	SRSF1_HUMAN	28 kDa	13	13	11	11
875	Cluster of Moesin OS=Homo sapiens GN=MSN PE=1 SV=3 (MOES_HUMAN)	MOES_HUMAN [3]	68 kDa	8	1	11	4
876	Matrin-3 OS=Homo sapiens GN=MATR3 PE=1 SV=2	MATR3_HUMAN	95 kDa	13	11	11	9
877	Interleukin enhancer-binding factor 2 OS=Homo sapiens GN=ILF2 PE=1 SV=2	ILF2_HUMAN	43 kDa	15	12	11	11
878	Heterogeneous nuclear ribonucleoprotein D-like OS=Homo sapiens GN=HNRNPDL PE=1 SV=3	HNRDL_HUMAN	46 kDa	12	9	11	9
879	Annexin A2 OS=Homo sapiens GN=ANXA2 PE=1 SV=2	ANXA2_HUMAN	39 kDa	9	13	11	9
880	Heterogeneous nuclear ribonucleoprotein R OS=Homo sapiens GN=HNRNPR PE=1 SV=1	HNRPR_HUMAN	71 kDa	22	18	11	14
881	Sickle tail protein homolog OS=Homo sapiens GN=KIAA1217 PE=1 SV=2	SKT_HUMAN	214 kDa	12	11	12	5
882	40S ribosomal protein S2 OS=Homo sapiens GN=RPS2 PE=1 SV=2	RS2_HUMAN	31 kDa	14	13	12	11
883	40S ribosomal protein S9 OS=Homo sapiens GN=RPS9 PE=1 SV=3	RS9_HUMAN	23 kDa	11	12	12	10
884	60S ribosomal protein L6 OS=Homo sapiens GN=RPL6 PE=1 SV=3	RL6_HUMAN	33 kDa	10	10	12	12
885	Heterogeneous nuclear ribonucleoprotein A3 OS=Homo sapiens GN=HNRNPA3 PE=1 SV=2	ROA3_HUMAN	40 kDa	15	10	12	8
886	Cluster of Heat shock 70 kDa protein 1A/1B OS=Homo sapiens GN=HSPA1A PE=1 SV=5 (HSP71_HUMAN)	HSP71_HUMAN [4]	70 kDa	19	15	12	9
887	Plasminogen activator inhibitor 1 RNA-binding protein OS=Homo sapiens GN=SERBP1 PE=1 SV=2	PAIRB_HUMAN	45 kDa	17	15	13	14
888	Guanine nucleotide-binding protein subunit beta-2-like 1 OS=Homo sapiens GN=GNB2L1 PE=1 SV=3	GBLP_HUMAN	35 kDa	16	15	13	10
889	60S ribosomal protein L4 OS=Homo sapiens GN=RPL4 PE=1 SV=5	RL4_HUMAN	48 kDa	15	13	13	12
890	Cluster of Tubulin alpha-3C/D chain OS=Homo sapiens GN=TUBA3C PE=1 SV=3 (TBA3C_HUMAN)	TBA3C_HUMAN [7]	50 kDa	24	23	13	16
891	40S ribosomal protein S3a OS=Homo sapiens GN=RPS3A PE=1 SV=2	RS3A_HUMAN	30 kDa	13	15	13	10
892	Transferrin receptor protein 1 OS=Homo sapiens GN=TFRC PE=1 SV=2	TFR1_HUMAN	85 kDa	3	1	13	11
893	40S ribosomal protein SA OS=Homo sapiens GN=RPSA PE=1 SV=4	RSSA_HUMAN	33 kDa	14	13	13	11
894	Heterogeneous nuclear ribonucleoprotein H OS=Homo sapiens GN=HNRNPH1 PE=1 SV=4	HNRH1_HUMAN	49 kDa	15	15	13	12
895	Protein TFG OS=Homo sapiens GN=TFG PE=1 SV=2	TFG_HUMAN	43 kDa	12	12	13	14
896	Cell cycle and apoptosis regulator protein 2 OS=Homo sapiens GN=CCAR2 PE=1 SV=2	CCAR2_HUMAN	103 kDa	22	23	14	5
897	Eukaryotic translation initiation factor 3 subunit A OS=Homo sapiens GN=EIF3A PE=1 SV=1	EIF3A_HUMAN	167 kDa	26	25	14	10
898	SWI/SNF complex subunit SMARCC1 OS=Homo sapiens GN=SMARCC1 PE=1 SV=3	SMRC1_HUMAN	123 kDa	17	24	14	12
899	Procollagen-lysine,2-oxoglutarate 5-dioxygenase 1 OS=Homo sapiens GN=PLOD1 PE=1 SV=2	PLOD1_HUMAN	84 kDa	12	10	14	13
900	Cluster of Transcription activator BRG1 OS=Homo sapiens GN=SMARCA4 PE=1 SV=2 (SMCA4_HUMAN)	SMCA4_HUMAN [2]	185 kDa	13	12	14	11
901	AT-rich interactive domain-containing protein 1A OS=Homo sapiens GN=ARID1A PE=1 SV=3	ARI1A_HUMAN	242 kDa	11	24	14	17
902	Nuclease-sensitive element-binding protein 1 OS=Homo sapiens GN=YBX1 PE=1 SV=3	YBOX1_HUMAN	36 kDa	13	11	14	13
903	Heterogeneous nuclear ribonucleoprotein Q OS=Homo sapiens GN=SYNCRIP PE=1 SV=2	HNRPQ_HUMAN	70 kDa	19	16	14	12
904	Regulator of nonsense transcripts 1 OS=Homo sapiens GN=UPF1 PE=1 SV=2	RENT1_HUMAN	124 kDa	22	21	15	10
905	Eukaryotic translation initiation factor 4 gamma 1 OS=Homo sapiens GN=EIF4G1 PE=1 SV=4	IF4G1_HUMAN	175 kDa	13	22	15	6
906	RNA-binding protein 14 OS=Homo sapiens GN=RBM14 PE=1 SV=2	RBM14_HUMAN	69 kDa	17	13	15	12
907	Cytoskeleton-associated protein 4 OS=Homo sapiens GN=CKAP4 PE=1 SV=2	CKAP4_HUMAN	66 kDa	16	15	15	15
908	Cluster of Beta-actin-like protein 2 OS=Homo sapiens GN=ACTBL2 PE=1 SV=2 (ACTBL_HUMAN)	ACTBL_HUMAN [10]	42 kDa	16	15	15	16
909	Heterogeneous nuclear ribonucleoprotein M OS=Homo sapiens GN=HNRNPM PE=1 SV=3	HNRPM_HUMAN	78 kDa	17	14	16	15
910	78 kDa glucose-regulated protein OS=Homo sapiens GN=HSPA5 PE=1 SV=2	GRP78_HUMAN	72 kDa	19	14	16	14
911	Glycogen debranching enzyme OS=Homo sapiens GN=AGL PE=1 SV=3	GDE_HUMAN	175 kDa	23	23	17	12
912	Cluster of Interleukin enhancer-binding factor 3 OS=Homo sapiens GN=ILF3 PE=1 SV=3 (ILF3_HUMAN)	ILF3_HUMAN [2]	95 kDa	23	17	17	16
913	SWI/SNF complex subunit SMARCC2 OS=Homo sapiens GN=SMARCC2 PE=1 SV=1	SMRC2_HUMAN	133 kDa	18	21	18	10
914	Cluster of Heterogeneous nuclear ribonucleoprotein A1 OS=Homo sapiens GN=HNRNPA1 PE=1 SV=5 (ROA1_HUMAN)	ROA1_HUMAN [2]	39 kDa	18	17	18	13
915	Probable ATP-dependent RNA helicase DDX17 OS=Homo sapiens GN=DDX17 PE=1 SV=2	DDX17_HUMAN	80 kDa	21	19	18	15
916	Nucleolin OS=Homo sapiens GN=NCL PE=1 SV=3	NUCL_HUMAN	77 kDa	21	14	18	18
917	Cluster of Tubulin beta chain OS=Homo sapiens GN=TUBB PE=1 SV=2 (TBB5_HUMAN)	TBB5_HUMAN [9]	50 kDa	43	43	19	17
918	Cluster of Polyadenylate-binding protein 4 OS=Homo sapiens GN=PABPC4 PE=1 SV=1 (PABP4_HUMAN)	PABP4_HUMAN [2]	71 kDa	23	16	19	18
919	Desmoplakin OS=Homo sapiens GN=DSP PE=1 SV=3	DESP_HUMAN	332 kDa	26	29	19	23
920	Cluster of La-related protein 1 OS=Homo sapiens GN=LARP1 PE=1 SV=2 (LARP1_HUMAN)	LARP1_HUMAN [2]	124 kDa	26	29	20	9
921	40S ribosomal protein S3 OS=Homo sapiens GN=RPS3 PE=1 SV=2	RS3_HUMAN	27 kDa	18	18	20	15
922	X-ray repair cross-complementing protein 6 OS=Homo sapiens GN=XRCC6 PE=1 SV=2	XRCC6_HUMAN	70 kDa	23	17	20	18
923	Putative ATP-dependent RNA helicase DHX30 OS=Homo sapiens GN=DHX30 PE=1 SV=1	DHX30_HUMAN	134 kDa	25	31	22	15
924	Heterogeneous nuclear ribonucleoproteins A2/B1 OS=Homo sapiens GN=HNRNPA2B1 PE=1 SV=2	ROA2_HUMAN	37 kDa	20	18	22	16
925	Cluster of Polyadenylate-binding protein 1 OS=Homo sapiens GN=PABPC1 PE=1 SV=2 (PABP1_HUMAN)	PABP1_HUMAN [4]	71 kDa	23	22	22	22
926	Transitional endoplasmic reticulum ATPase OS=Homo sapiens GN=VCP PE=1 SV=4	TERA_HUMAN	89 kDa	21	20	22	27
927	Probable ATP-dependent RNA helicase DDX5 OS=Homo sapiens GN=DDX5 PE=1 SV=1	DDX5_HUMAN	69 kDa	26	23	22	21
928	ATP-dependent RNA helicase DDX1 OS=Homo sapiens GN=DDX1 PE=1 SV=2	DDX1_HUMAN	82 kDa	23	14	23	18
929	Cluster of Heat shock cognate 71 kDa protein OS=Homo sapiens GN=HSPA8 PE=1 SV=1 (HSP7C_HUMAN)	HSP7C_HUMAN [2]	71 kDa	26	25	24	23
930	Heterogeneous nuclear ribonucleoprotein U-like protein 1 OS=Homo sapiens GN=HNRNPUL1 PE=1 SV=2	HNRL1_HUMAN	96 kDa	23	25	25	22
931	Heterogeneous nuclear ribonucleoprotein U OS=Homo sapiens GN=HNRNPU PE=1 SV=6	HNRPU_HUMAN	91 kDa	21	14	26	17
932	Cluster of Clathrin heavy chain 1 OS=Homo sapiens GN=CLTC PE=1 SV=5 (CLH1_HUMAN)	CLH1_HUMAN [2]	192 kDa	29	33	26	47
933	Cluster of ATP-dependent RNA helicase DDX3X OS=Homo sapiens GN=DDX3X PE=1 SV=3 (DDX3X_HUMAN)	DDX3X_HUMAN [2]	73 kDa	29	26	26	20
934	Filamin-A OS=Homo sapiens GN=FLNA PE=1 SV=4	FLNA_HUMAN	281 kDa	38	46	26	25
935	X-ray repair cross-complementing protein 5 OS=Homo sapiens GN=XRCC5 PE=1 SV=3	XRCC5_HUMAN	83 kDa	18	14	27	21
936	Plectin OS=Homo sapiens GN=PLEC PE=1 SV=3	PLEC_HUMAN	532 kDa	65	70	30	81
937	Neuroblast differentiation-associated protein AHNAK OS=Homo sapiens GN=AHNAK PE=1 SV=2	AHNK_HUMAN	629 kDa	8	21	31	56
938	Major vault protein OS=Homo sapiens GN=MVP PE=1 SV=4	MVP_HUMAN	99 kDa	35	34	31	37
939	ATP-dependent RNA helicase A OS=Homo sapiens GN=DHX9 PE=1 SV=4	DHX9_HUMAN	141 kDa	37	35	36	34
940
END OF FILE
Legend:
Known cyclin F-interacting proteins are in bold and highlighted in blue.
USP7 (highlighted in yellow) is a novel cyclin F-interacting protein, validated in this study, that has not been previously reported.
