# Supplementary material for: The deubiquitylase USP7 is a novel cyclin F-interacting protein and regulates cyclin F protein stability
Source: publisher site journal article supplement (doi:10.18632/aging.204372), 2022-11-05
Supplement: Supplementary file [file aging-v14i21-204372-supplementary-material-SD2.pdf]

## SUPPLEMENTARY FIGURE

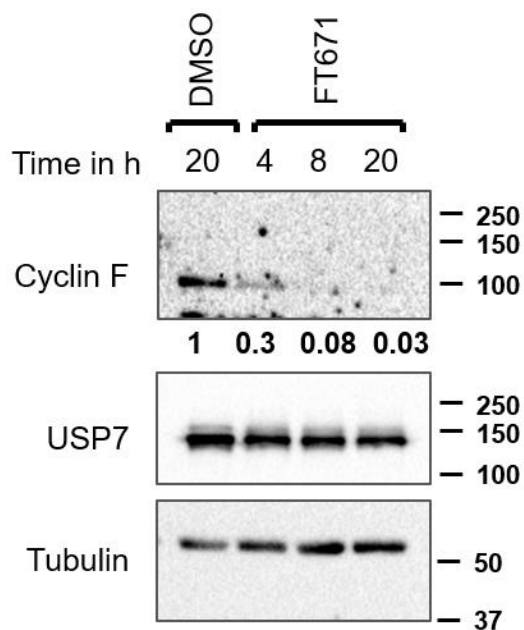

**Supplementary Figure 1. USP7 regulates cyclin F protein levels.** HCT116 cells treated with DMSO or FT671 (10  $\mu$ M) for the indicated hours were lysed, and immunoblotted as indicated.  $\beta$ -Actin was the loading control. Asterisks denote non-specific bands. Fold changes were calculated with densitometric values for cyclin F blot using tubulin as loading control.
